# Supplementary material for: Transcriptomic meta-analysis identifies gene expression characteristics in various samples of HIV-infected patients with nonprogressive disease
Source: J Transl Med. 2017 Sep 12;15:191. doi: 10.1186/s12967-017-1294-5 (PMC5596944; doi:10.1186/s12967-017-1294-5)
Supplement: Supplementary file 1 — Additional file 1: Table S1A. The 20 most significantly up-regulated and 20 most significantly down-regulated genes in nonprogressors. Table S2B. The 20 most significantly up-regulated and 20 most significantly down-regulated genes in nonprogressors of CD4+ T cells. Table S3C. The 20 most significantly up-regulated and 20 most significantly down-regulated genes in nonprogressors of CD8+ T cells. [file 12967_2017_1294_MOESM1_ESM.xlsx]

## Sheet: Table S1A
Table S1A: The 20 most significantly up-regulated and 20 most significantly down-regulated genes in nonprogressors of whole blood
Entrez ID	Gene symbol	Combined rank product	Average log fold change
	20 most significantly up-regulated genes
140807	KRT72	229.51	0.580742
1669	DEFA4	270.32	0.511947
6192	RPS4Y1	309.9	1.16213
25893	TRIM58	434.49	0.575694
8284	KDM5D	440.44	1.06128
6622	SNCA	483.63	0.658255
10098	TSPAN5	531.31	0.510695
9086	EIF1AY	580.61	0.800405
2038	EPB42	618.94	0.600757
6521	SLC4A1	632.02	0.598117
7145	TNS1	649.64	0.530371
143686	SESN3	662.51	0.510052
3690	ITGB3	709.2	0.561125
5627	PROS1	906.47	0.693704
246126	TXLNG2P	930.58	0.596989
81027	TUBB1	938.74	0.558529
6678	SPARC	1416.42	0.591697
10398	MYL9	1551.53	0.54036
7504	XK	1783.57	0.567848
9891	NUAK1	1803.35	0.906946
	20 most significantly down-regulated genes
3429	IFI27	35.61	-0.948905
57801	HES4	187.1	-0.665998
3959	LGALS3BP	238.57	-0.686946
4061	LY6E	260.35	-0.607156
26519	TIMM10	289.63	-0.804127
3004	GZMM	329.91	-0.608188
9022	CLIC3	413.97	-0.75954
991	CDC20	552.42	-0.645228
952	CD38	562.8	-0.723494
7503	XIST	654.15	-0.879091
8365	HIST1H4H	738.3	-0.625425
9997	SCO2	982.28	-0.652977
51237	MZB1	985.22	-0.606217
165530	CLEC4F	1191.19	-0.734423
6368	CCL23	1219.56	-0.929659
260429	PRSS33	1523.54	-0.73921
51020	HDDC2	1629.79	-0.659904
284415	VSTM1	2179.53	-0.720303
10917	BTNL3	2485.73	-0.690408
400709	SIGLEC16	2757.95	-0.688885

## Sheet: Table S1B
Table S1B: The 20 most significantly up-regulated and 20 most significantly down-regulated genes in nonprogressors of CD4+ T cells
Entrez ID	Gene symbol	Combined rank product	Average log fold change
	20 most significantly up-regulated genes
54541	DDIT4	462.78	0.426828
7057	THBS1	468.71	0.433853
1975	EIF4B	721.64	0.432218
5055	SERPINB2	735.4	0.707027
3315	HSPB1	799.26	0.41583
3820	KLRB1	858.29	0.595801
8807	IL18RAP	920.73	0.420523
29944	PNMA3	925.62	0.424948
8970	HIST1H2BJ	1114.9	0.77945
1397	CRIP2	1225.72	0.529365
5081	PAX7	1463.53	0.552383
53635	PTOV1	1510.72	0.426092
1968	EIF2S3	1542.48	0.466752
50856	CLEC4A	1556.7	0.461016
6653	SORL1	1574.25	0.458334
7169	TPM2	1739.23	0.497764
728	C5AR1	1746.85	0.810784
6624	FSCN1	1996.09	0.65436
4900	NRGN	2169.79	1.14554
3613	IMPA2	2259.89	0.412035
	20 most significantly down-regulated genes
10964	IFI44L	45.53	-3.01173
4599	MX1	62.26	-1.93395
3429	IFI27	76.12	-2.23615
10561	IFI44	105.04	-1.74663
10410	IFITM3	119.2	-0.992789
2537	IFI6	195.07	-1.17497
9636	ISG15	267.23	-1.26289
4061	LY6E	337.41	-1.01604
6279	S100A8	389.58	-1.15993
5610	EIF2AK2	394.71	-0.976469
4940	OAS3	562.98	-1.03628
6280	S100A9	596.21	-1.054
54739	XAF1	644.35	-0.924513
6036	RNASE2	734.79	-0.926505
3437	IFIT3	1228.34	-0.962097
4938	OAS1	1535.73	-1.10621
26010	SPATS2L	1613.36	-1.13927
7153	TOP2A	1777.68	-0.908948
91543	RSAD2	1826.9	-1.00844
3512	IGJ	1970.57	-0.95712

## Sheet: Table S1C
Table S1C: The 20 most significantly up-regulated and 20 most significantly down-regulated genes in nonprogressors of CD8+ T cells
Entrez ID	Gene symbol	Combined rank product	Average log fold change
	20 most significantly up-regulated genes
4753	NELL2	483.93	1.06455
1236	CCR7	546.14	0.646056
3575	IL7R	610.92	0.598402
113791	PIK3IP1	675.98	0.733229
8140	SLC7A5	711.57	0.600025
28984	RGCC	861.9	0.632463
1647	GADD45A	1127.46	0.754472
79673	ZNF329	1167.22	0.562473
57125	PLXDC1	1239.28	0.660313
4092	SMAD7	1304.84	0.594957
65986	ZBTB10	1349.57	0.806853
23764	MAFF	1446.65	0.55789
3315	HSPB1	1556.01	0.563139
79921	TCEAL4	1763.39	0.620879
55175	KLHL11	1825.14	0.700746
5473	PPBP	2008.27	1.13744
374	AREG	2211	0.547976
6285	S100B	2402.49	0.716049
256051	ZNF549	2541.61	0.824407
8910	SGCE	2666.23	0.642654
	20 most significantly down-regulated genes
10964	IFI44L	39.72	-3.1332
10561	IFI44	125.97	-1.88883
4599	MX1	251.8	-1.62164
10410	IFITM3	314.58	-0.948652
3429	IFI27	343.02	-2.0867
2537	IFI6	391.55	-1.13192
54739	XAF1	482.05	-1.0989
9636	ISG15	647.37	-1.06406
3430	IFI35	714.34	-0.903893
4939	OAS2	865.01	-0.863587
4940	OAS3	929.89	-0.927889
3434	IFIT1	940.92	-1.48525
4938	OAS1	986.89	-1.21061
91543	RSAD2	1033.4	-1.21463
952	CD38	1394.04	-0.895257
3437	IFIT3	1610.67	-0.971089
51659	GINS2	1654.36	-1.08765
11274	USP18	1789.58	-1.03002
9381	OTOF	2151.63	-0.876232
580	BARD1	2750.9	-0.882179
