# Supplementary material for: Transcriptomic meta-analysis identifies gene expression characteristics in various samples of HIV-infected patients with nonprogressive disease
Source: J Transl Med. 2017 Sep 12;15:191. doi: 10.1186/s12967-017-1294-5 (PMC5596944; doi:10.1186/s12967-017-1294-5)
Supplement: Supplementary file 2 — Additional file 2: Table S2A. All the DEGs in nonprogressors of whole blood. Table S2B. All the DEGs in nonprogressors of CD4+ T cells. Table S3C. All the DEGs in nonprogressors of CD8+ T cells. [file 12967_2017_1294_MOESM2_ESM.xlsx]

## Sheet: Table S2A
Table S2A: All the DEGs in nonprogressors of whole blood
EntrezID	Name	CombinedRP	AveLogFC
6192	RPS4Y1	309.902	1.16213
8284	KDM5D	440.439	1.06128
9891	NUAK1	1803.35	0.906946
9086	EIF1AY	580.614	0.800405
5627	PROS1	906.475	0.693704
6622	SNCA	483.633	0.658255
2038	EPB42	618.938	0.600757
6521	SLC4A1	632.021	0.598117
246126	TXLNG2P	930.582	0.596989
6678	SPARC	1416.42	0.591697
140807	KRT72	229.511	0.580742
25893	TRIM58	434.487	0.575694
7504	XK	1783.57	0.567848
3690	ITGB3	709.204	0.561125
81027	TUBB1	938.738	0.558529
10398	MYL9	1551.53	0.54036
7145	TNS1	649.641	0.530371
1669	DEFA4	270.325	0.511947
10098	TSPAN5	531.313	0.510695
143686	SESN3	662.51	0.510052
10826	C5orf4	1129.8	0.50974
10562	OLFM4	832.25	0.507362
10644	IGF2BP2	587.535	0.494211
55437	STRADB	487	0.490924
343171	OR2W3	1003.87	0.484604
1088	CEACAM8	369.982	0.482912
2162	F13A1	987.402	0.471453
139105	BEND2	2667.35	0.463951
2205	FCER1A	588.645	0.44955
25853	DCAF12	754.111	0.449341
340205	TREML1	2137.51	0.447726
56344	CABP5	2078	0.445346
3674	ITGA2B	794.521	0.441534
10217	CTDSPL	600.789	0.440353
9717	SEC14L5	1761.53	0.416001
5473	PPBP	821.283	0.410017
83699	SH3BGRL2	604.258	0.408204
7111	TMOD1	751.865	0.40618
3848	KRT1	706.964	0.404634
4900	NRGN	963.953	0.397383
22885	ABLIM3	2406.37	0.39419
8436	SDPR	1162.67	0.392455
3575	IL7R	532.061	0.381092
2791	GNG11	914.388	0.377416
4680	CEACAM6	664.2	0.371741
23762	OSBP2	861.953	0.369573
8991	SELENBP1	1439.13	0.36301
23705	CADM1	2252.36	0.361556
2017	CTTN	2011.17	0.358269
671	BPI	652.224	0.357525
2944	GSTM1	529.645	0.351875
8605	PLA2G4C	2627.35	0.347958
4057	LTF	367.807	0.344073
5305	PIP4K2A	849.726	0.338171
220972	2017-03-08	2468.13	0.330176
57535	KIAA1324	224.396	0.329896
10158	PDZK1IP1	326.1	0.329762
2946	GSTM2	616.375	0.321636
4352	MPL	1499.16	0.319087
23531	MMD	1092.11	0.317429
3693	ITGB5	2325.97	0.308791
26499	PLEK2	1295.92	0.308131
3045	HBD	1357.19	0.304478
3934	LCN2	601.776	0.304193
5742	PTGS1	1616.37	0.299903
116173	CMTM5	1996.83	0.295916
5616	PRKY	809.835	0.293616
10867	TSPAN9	1119.08	0.287987
116151	FAM210B	966.578	0.278418
4753	NELL2	1075.15	0.267438
49861	CLDN20	2492.51	0.26066
83700	JAM3	1193.02	0.257992
759	CA1	972.711	0.257814
6512	SLC1A7	1730.22	0.254858
4303	FOXO4	2694.95	0.25099
6535	SLC6A8	1590.55	0.250416
2039	EPB49	1550.06	0.248112
2766	GMPR	1832.11	0.243872
598	BCL2L1	1430.57	0.233737
239	ALOX12	1374.94	0.232372
27344	PCSK1N	1570.13	0.227647
23608	MKRN1	1694.43	0.226661
623	BDKRB1	1646.96	0.226372
84953	MICALCL	1944.64	0.226013
51176	LEF1	570.639	0.225739
55544	RBM38	1942.46	0.220304
84164	ASCC2	1542.88	0.218115
3119	HLA-DQB1	1205.88	0.217508
1397	CRIP2	1620.37	0.215581
10107	TRIM10	2049.76	0.211986
5866	RAB3IL1	1042.59	0.211495
54855	FAM46C	1718.18	0.210897
11026	LILRA3	1869.95	0.208522
57189	KIAA1147	2145.84	0.205307
259215	LY6G6F	1893.21	0.204565
2935	GSPT1	1638.5	0.203931
1508	CTSB	2593.11	0.203421
2710	GK	1982	0.202853
11098	PRSS23	2675.62	0.20072
89872	AQP10	1824.66	0.196424
402055	SRRD	1451.01	0.19299
6653	SORL1	1446.07	0.192771
79652	TMEM204	1392.76	0.188427
7057	THBS1	2070.14	0.187822
2947	GSTM3	1648.44	0.187381
7802	DNALI1	2710.82	0.185645
1511	CTSG	932.508	0.185484
128553	TSHZ2	924.397	0.183457
4155	MBP	2128.27	0.182636
201191	SAMD14	1729.15	0.182479
7450	VWF	1349.3	0.181455
5990	RFX2	2173.12	0.17924
56729	RETN	1281.63	0.178926
319101	KRT73	617.671	0.177194
9921	RNF10	2032.23	0.177001
7125	TNNC2	2186.13	0.174463
25793	FBXO7	1808.08	0.17436
9019	MPZL1	2081.44	0.173395
2041	EPHA1	1428.28	0.171201
57095	PITHD1	1945.26	0.166632
84923	FAM104A	2335.68	0.165225
1238	CCBP2	1623.11	0.163666
197322	ACSF3	1536.7	0.162035
8313	AXIN2	1602.53	0.160982
134147	CMBL	2300.07	0.160477
1870	E2F2	2379.57	0.159332
641455	POTEM	2388.77	0.15496
80700	UBXN6	2036.44	0.154087
83538	TTC25	1482.21	0.152888
23312	DMXL2	2188.38	0.151733
51312	SLC25A37	1905.22	0.15085
5730	PTGDS	1746.15	0.149978
7781	SLC30A3	2200.64	0.149517
2273	FHL1	2278.2	0.148556
3792	KEL	1951.39	0.148289
157927	C9orf62	1914.35	0.146677
116496	FAM129A	2105.05	0.140523
92745	SLC38A5	2672.81	0.140284
4354	MPP1	1754.24	0.140244
2815	GP9	1855.58	0.139495
8644	AKR1C3	2208.74	0.139086
8660	IRS2	1080.95	0.138836
8911	CACNA1I	2356.74	0.137298
284904	SEC14L4	2074.92	0.136455
57336	ZNF287	2682.06	0.135271
221037	JMJD1C	1893.07	0.132727
5816	PVALB	1979.43	0.1304
7739	ZNF185	2137.34	0.129871
4973	OLR1	1225.85	0.129611
9882	TBC1D4	2157.42	0.127719
51218	GLRX5	2233.6	0.126783
256302	C17orf103	2673.42	0.125174
440993	LOC440993	2187.17	0.124414
55701	ARHGEF40	2686.63	0.123074
6123	RPL3L	1952.56	0.118749
23187	PHLDB1	2280.37	0.118245
1991	ELANE	716.554	0.118208
3046	HBE1	1482.7	0.113138
7122	CLDN5	2537.76	0.11255
54861	SNRK	2454.17	0.110635
56896	DPYSL5	1791.37	0.108903
26994	RNF11	2452.29	0.108807
79191	IRX3	2293.54	0.108352
6397	SEC14L1	2166.6	0.104067
51094	ADIPOR1	2335.43	0.103526
9764	KIAA0513	2464.94	0.102512
54997	TESC	1446.35	0.10203
222166	C7orf41	2311.34	0.0994489
57162	PELI1	1312.58	0.0926755
55893	ZNF395	2458.17	0.0911319
5578	PRKCA	2057.81	0.0905819
7178	TPT1	1393.13	0.0895497
1236	CCR7	693.966	0.087221
6374	CXCL5	2673.99	0.0851326
55007	FAM118A	1265.45	0.0819318
10097	ACTR2	2595.25	0.0801262
116328	C8orf34	2406.34	0.0776462
84641	HIATL1	2133.5	0.0760628
26119	LDLRAP1	1986.25	0.0738255
23178	PASK	2310.91	0.0730915
10516	FBLN5	2683.78	0.0690018
91734	IDI2	2477.47	0.0689801
113791	PIK3IP1	2321.7	0.0689267
55600	ITLN1	1504.26	0.0688328
84288	EFCAB2	2477.96	0.0643226
6920	TCEA3	2143.74	0.0620021
3067	HDC	1549.53	0.0594715
2776	GNAQ	2327.95	0.0590855
219738	C10orf35	2624.59	0.0581708
1439	CSF2RB	2675.11	0.0573466
10320	IKZF1	2090.63	0.0556756
830	CAPZA2	2506.51	0.0544907
83483	PLVAP	1521.05	0.0541083
80183	KIAA0226L	2476.63	0.053652
1455	CSNK1G2	1835.54	0.0500224
56953	NT5M	2527.55	0.0493412
4353	MPO	2461.12	0.0480232
92270	ATP6AP1L	2608.15	0.0479877
445347	TARP	1986.34	0.0462197
57488	ESYT2	2502.24	0.0460786
3029	HAGH	1848.62	0.0459438
4069	LYZ	2287.91	0.043181
8807	IL18RAP	2003.08	0.0419186
152185	SPICE1	2667.63	0.0412163
51522	TMEM14C	2509.17	0.0406809
51060	TXNDC12	2019.79	0.0380993
2317	FLNB	1936.33	0.0373009
79992	AGPAT4-IT1	2657.46	0.025904
1880	GPR183	2240.2	0.022742
150864	FAM117B	2292.78	0.0207608
246734	NPCDR1	2341.82	0.0163169
3570	IL6R	2678.07	0.0120429
55251	PCMTD2	2578.75	0.00750856
23208	SYT11	2285.6	0.00592254
10900	RUNDC3A	1863.28	0.00415625
566	AZU1	1668.42	-0.000327693
64411	ARAP3	2215.07	-0.00528704
5266	PI3	442.135	-0.00568127
645	BLVRB	2400.25	-0.0128869
25907	TMEM158	1877.15	-0.0146766
212	ALAS2	2637.31	-0.0154292
23770	FKBP8	1985.7	-0.0198695
57674	RNF213	2516.75	-0.0201023
2053	EPHX2	2176.4	-0.0228666
3613	IMPA2	2018.33	-0.0235099
255231	MCOLN2	2058.77	-0.0251912
5004	ORM1	1310.8	-0.028286
5159	PDGFRB	1680.31	-0.0325496
216	ALDH1A1	1972.25	-0.034852
1028	CDKN1C	2504.82	-0.0430418
26047	CNTNAP2	2645.45	-0.0446808
22918	CD93	2277.76	-0.0467589
2208	FCER2	2541.74	-0.0472611
56911	C21orf7	2670.9	-0.0495517
4118	MAL	1297.72	-0.0506585
7433	VIPR1	1930.29	-0.0520942
1350	COX7C	2556.24	-0.0527556
90649	ZNF486	2703.26	-0.0563903
9289	GPR56	2680.03	-0.0586729
129607	CMPK2	2106.01	-0.0595283
2272	FHIT	2426.12	-0.0619176
29944	PNMA3	2400.24	-0.0638488
3804	KIR2DL3	2443.72	-0.068113
5214	PFKP	1960.92	-0.0702766
57124	CD248	2053.78	-0.0729817
9242	MSC	1326.66	-0.0731816
3803	KIR2DL2	2539.78	-0.0742287
11039	SMA4	2308.12	-0.0757527
7294	TXK	1481.22	-0.0782204
220001	VWCE	539.739	-0.0783957
6301	SARS	2597.21	-0.0793839
85379	KIAA1671	2038.68	-0.0803114
60468	BACH2	2626.05	-0.0816485
54947	LPCAT2	2649.79	-0.0829516
84719	LINC00260	2250.61	-0.0836068
400566	C17orf97	2377.01	-0.0852931
51191	HERC5	1911.56	-0.0888689
820	CAMP	2236.11	-0.0900713
714	C1QC	2797.6	-0.0924174
1847	DUSP5	2449.76	-0.0938974
4157	MC1R	2424.47	-0.0980963
3003	GZMK	2687.39	-0.0983587
1514	CTSL1	1976.83	-0.0988506
83715	ESPN	1974.54	-0.106254
1984	EIF5A	1960.38	-0.106291
54900	LAX1	2231.06	-0.107388
159195	USP54	2607.78	-0.109995
27065	D4S234E	1949.67	-0.110607
64135	IFIH1	2590.51	-0.111076
2672	GFI1	2041.19	-0.113052
155066	ATP6V0E2	2176.7	-0.113862
10125	RASGRP1	2734.12	-0.114478
2952	GSTT1	2277.72	-0.119247
4599	MX1	1681.59	-0.121303
79899	PRR5L	2485.37	-0.121837
6037	RNASE3	1114.31	-0.122369
157285	SGK223	2435.06	-0.12324
10985	GCN1L1	2778.09	-0.123701
3049	HBQ1	1817.74	-0.124344
4940	OAS3	1847.12	-0.124417
303	ANXA2P1	1681.48	-0.124959
24138	IFIT5	2676.4	-0.124969
250	ALPP	2211.56	-0.125276
51513	ETV7	2774.89	-0.125963
50650	ARHGEF3	2540.04	-0.128482
3434	IFIT1	1941.99	-0.130683
84058	WDR54	1992.75	-0.131
387357	THEMIS	2107.08	-0.132673
54674	LRRN3	850.041	-0.132996
54438	GFOD1	2432.53	-0.133189
970	CD70	2041.56	-0.133764
1396	CRIP1	2093.18	-0.134323
9256	BZRAP1	2420.35	-0.137928
114836	SLAMF6	2481.52	-0.137955
23495	TNFRSF13B	2440.76	-0.138221
388588	LOC388588	1661.65	-0.13969
152189	CMTM8	1746.33	-0.139814
80162	ATHL1	1882.57	-0.140926
3635	INPP5D	2737.52	-0.143628
85236	HIST1H2BK	2588.67	-0.145683
158248	TTC16	2538.36	-0.146414
3042	HBM	2381.36	-0.146716
7430	EZR	2153.84	-0.147239
7049	TGFBR3	1985.29	-0.148994
162979	ZNF296	2593.37	-0.149221
10397	NDRG1	2315.81	-0.150183
55646	LYAR	2646.68	-0.150302
84839	RAX2	2341.58	-0.150331
4175	MCM6	2648.08	-0.150607
55601	DDX60	2495.7	-0.151174
10346	TRIM22	2546.11	-0.151664
5533	PPP3CC	2793.84	-0.151946
7076	TIMP1	2395.41	-0.153175
8357	HIST1H3H	2194.23	-0.15387
875	CBS	2452.57	-0.154941
51056	LAP3	2207.08	-0.155843
4068	SH2D1A	2622.67	-0.158954
256236	NAPSB	2594.43	-0.159453
8111	GPR68	2083.37	-0.159454
64167	ERAP2	2228.01	-0.160108
3949	LDLR	2415.8	-0.162323
54758	KLHDC4	2678.87	-0.162362
79414	LRFN3	2710.87	-0.162861
57823	SLAMF7	2493.44	-0.16363
221895	JAZF1	2756.01	-0.164109
283989	TSEN54	2228.6	-0.164459
8631	SKAP1	2607.4	-0.169316
923	CD6	2351.84	-0.169551
3065	HDAC1	2628.52	-0.171452
83955	NACAP1	2688.17	-0.171509
84824	FCRLA	1725.33	-0.173384
154	ADRB2	1302.27	-0.174777
5341	PLEK	2657.88	-0.177074
27347	STK39	2505.7	-0.177468
54809	SAMD9	2342.22	-0.17804
54625	PARP14	1692.63	-0.178657
142679	DUSP19	2149.03	-0.178806
309	ANXA6	2737.48	-0.180432
4302	MLLT6	2633.79	-0.180433
440275	EIF2AK4	2786.5	-0.180911
11137	PWP1	2659.92	-0.180947
3433	IFIT2	2278.97	-0.181279
55142	HAUS2	2712.62	-0.181945
8934	RAB7L1	2725.05	-0.18215
3824	KLRD1	2619.33	-0.183105
114879	OSBPL5	1874.25	-0.183396
6897	TARS	2140.76	-0.183828
55656	INTS8	2781.7	-0.185924
197135	PATL2	1126.79	-0.185983
199675	C19orf59	2198.72	-0.186934
80021	TMEM62	2557.56	-0.187301
55092	TMEM51	2589.48	-0.187487
677	ZFP36L1	2006.85	-0.189024
440704	LOC440704	2215.65	-0.18931
7266	DNAJC7	2641.73	-0.189432
64782	AEN	2330.56	-0.189805
5359	PLSCR1	1322.84	-0.190228
57568	SIPA1L2	2638.6	-0.190456
90135	BTBD6	2539.74	-0.190829
5686	PSMA5	2136.51	-0.192098
10971	YWHAQ	2351.46	-0.192248
51493	C22orf28	2745.07	-0.193449
54502	RBM47	2787.64	-0.196266
7385	UQCRC2	2351.91	-0.196949
9404	LPXN	1968.9	-0.197352
713	C1QB	1080.57	-0.197608
113246	C12orf57	2233.47	-0.198209
7264	TSTA3	2350.97	-0.198663
3627	CXCL10	2422.78	-0.198737
6752	SSTR2	1747.34	-0.199627
55024	BANK1	2499.21	-0.199868
1462	VCAN	2075.31	-0.200562
6281	S100A10	2129.68	-0.200934
8125	ANP32A	2117.92	-0.203177
26030	PLEKHG3	2711.05	-0.204332
4835	NQO2	1623	-0.205407
162466	PHOSPHO1	2430.11	-0.205479
55884	WSB2	2750.34	-0.205845
114049	WBSCR22	2611.57	-0.205948
8349	HIST2H2BE	1943.69	-0.206478
51571	FAM49B	2334.28	-0.20692
4702	NDUFA8	2797.53	-0.206949
138428	PTRH1	2570.59	-0.207232
7260	TSSC1	2680.39	-0.207473
57215	THAP11	2480.99	-0.207707
93210	PGAP3	2644.86	-0.208436
51063	CALHM2	2017.84	-0.208504
1524	CX3CR1	1585.95	-0.209034
4600	MX2	1966.11	-0.209749
5551	PRF1	1238.03	-0.210183
8705	B3GALT4	2723.05	-0.210249
10092	ARPC5	2696.76	-0.211764
8743	TNFSF10	2650	-0.212105
2833	CXCR3	1903.5	-0.212447
8216	LZTR1	2779.13	-0.212853
6614	SIGLEC1	1101.64	-0.213134
9235	IL32	1961.04	-0.213163
401494	PTPLAD2	1623.97	-0.213285
7494	XBP1	2234.22	-0.213442
92922	CCDC102A	2454.52	-0.213611
55281	TMEM140	2170.07	-0.213653
4082	MARCKS	2255.41	-0.213754
51466	EVL	2624.2	-0.21433
94240	EPSTI1	1630.44	-0.214391
26262	TSPAN17	2573.6	-0.214883
23029	RBM34	2440.01	-0.214924
23406	COTL1	2655.18	-0.215156
29082	CHMP4A	2253.88	-0.215313
2483	FRG1	1882.89	-0.215398
8320	EOMES	1772.82	-0.215597
7351	UCP2	1848.29	-0.216058
1675	CFD	995.549	-0.216275
1230	CCR1	2088.78	-0.217227
11188	NISCH	2796.24	-0.217371
136051	ZNF786	2228.12	-0.217449
200185	KRTCAP2	2024.2	-0.217624
253018	HCG27	2523.39	-0.218681
2633	GBP1	2070.89	-0.220146
81622	UNC93B1	2711.56	-0.221492
81844	TRIM56	1772.84	-0.221566
55603	FAM46A	2583.42	-0.221876
1298	COL9A2	2774.45	-0.223625
9524	TECR	1696.14	-0.22428
231	AKR1B1	2754.49	-0.224735
3303	HSPA1A	2017.1	-0.224871
11014	KDELR2	2594.05	-0.225289
130589	GALM	1633.84	-0.225475
7726	TRIM26	2575.67	-0.225577
3087	HHEX	2231.62	-0.226419
6210	RPS15A	2802.38	-0.226651
1445	CSK	2796.82	-0.226667
10627	MYL12A	2690	-0.226948
203068	TUBB	2726.54	-0.227197
10490	VTI1B	2721.34	-0.227291
5184	PEPD	2560.47	-0.227355
10449	ACAA2	2501.81	-0.227385
64968	MRPS6	2587.08	-0.227781
28959	TMEM176B	1349.86	-0.22799
3128	HLA-DRB6	1136.13	-0.228344
55655	NLRP2	1650.8	-0.228853
341405	ANKRD33	1619.16	-0.229079
6283	S100A12	2422.13	-0.230114
79685	SAP30L	2680.4	-0.230265
10063	COX17	2724.5	-0.230512
3939	LDHA	2295.25	-0.230844
90313	TP53I13	2644.21	-0.231314
9133	CCNB2	2051.12	-0.231492
10728	PTGES3	2157.2	-0.232139
60675	PROK2	1933.09	-0.232186
10673	TNFSF13B	2223.04	-0.232892
3133	HLA-E	2220.77	-0.233791
374666	WASH3P	2759.65	-0.234039
10608	MXD4	2191.52	-0.234136
1059	CENPB	2594.23	-0.234744
4688	NCF2	2358.24	-0.23586
11184	MAP4K1	2023.05	-0.23611
8536	CAMK1	1727.55	-0.236208
2968	GTF2H4	1948.35	-0.23631
8651	SOCS1	2591.66	-0.23685
84269	CHCHD5	2788.68	-0.23704
10952	SEC61B	2229.59	-0.237214
10963	STIP1	2552.99	-0.237428
4501	MT1X	1598.5	-0.238124
7409	VAV1	2472.06	-0.239089
356	FASLG	2154.79	-0.239575
121355	GTSF1	1800.98	-0.240007
374291	NDUFS7	2670.2	-0.24039
8685	MARCO	1972.07	-0.240838
967	CD63	2387.99	-0.240916
55501	CHST12	1069.94	-0.241423
3315	HSPB1	2110.56	-0.242056
2180	ACSL1	1940.44	-0.242142
22809	ATF5	1732.7	-0.242659
64342	HS1BP3	2572.88	-0.242835
163	AP2B1	2259.97	-0.243315
10989	IMMT	2228.31	-0.243384
3431	SP110	2157.85	-0.244093
131540	ZDHHC19	2159.68	-0.244133
53637	S1PR5	1661.58	-0.244488
26121	PRPF31	2528.96	-0.244653
8548	BLZF1	2115.37	-0.244741
200315	APOBEC3A	1707.34	-0.24516
9935	MAFB	2133.39	-0.246406
11337	GABARAP	2311.16	-0.246447
79002	C19orf43	1719.98	-0.246933
59	ACTA2	1154.78	-0.247721
1777	DNASE2	2187.94	-0.248551
388	RHOB	1782.69	-0.248976
30844	EHD4	2210.79	-0.249457
916	CD3E	2360.25	-0.249598
9219	MTA2	2786.8	-0.249792
811	CALR	2494.99	-0.249879
5119	CHMP1A	2525.59	-0.250231
1891	ECH1	2424.35	-0.25027
8565	YARS	2200.83	-0.25127
23424	TDRD7	2805.72	-0.251499
5690	PSMB2	2119.34	-0.252086
3705	ITPK1	2547.3	-0.252371
56848	SPHK2	2611.66	-0.252384
9541	CIR1	2283.93	-0.252612
10473	HMGN4	2234.37	-0.252897
285093	CXXC11	1343.18	-0.252974
3669	ISG20	2609.28	-0.253087
164022	PPIAL4A	2347.98	-0.253188
161882	ZFPM1	2029.93	-0.253356
55163	PNPO	2676.07	-0.254456
6223	RPS19	2473.27	-0.254457
60673	C12orf44	2760.13	-0.255185
9519	TBPL1	2738	-0.256368
5905	RANGAP1	2214.03	-0.256819
402	ARL2	2665.83	-0.257083
3006	HIST1H1C	1981.88	-0.257984
608	TNFRSF17	1902.18	-0.258093
8574	AKR7A2	2707.7	-0.258115
10535	RNASEH2A	2420.78	-0.258257
8459	TPST2	2511.53	-0.258437
4722	NDUFS3	2704.84	-0.258515
973	CD79A	2796.5	-0.258667
79958	DENND1C	2498.5	-0.258896
10437	IFI30	1862.15	-0.25899
2992	GYG1	1929.7	-0.259371
396	ARHGDIA	2234.01	-0.259428
4615	MYD88	2663.38	-0.260212
3105	HLA-A	2298.71	-0.261149
9123	SLC16A3	2641.34	-0.261243
23034	SAMD4A	1629.29	-0.261567
84875	PARP10	2176.7	-0.262284
90956	ADCK2	2787.88	-0.262484
2617	GARS	2432.6	-0.262518
22993	HMGXB3	2505.61	-0.263525
54584	GNB1L	1759.68	-0.263534
4938	OAS1	893.821	-0.263635
6189	RPS3A	2692.21	-0.263716
126003	TRAPPC5	2651.64	-0.263867
29889	GNL2	2607.9	-0.263959
56681	SAR1A	1826.12	-0.263986
1509	CTSD	2601.56	-0.264286
11018	TMED1	2285.79	-0.26548
387	RHOA	2631.64	-0.265643
962	CD48	1491.79	-0.266259
25862	USP49	1914.75	-0.266516
5698	PSMB9	2265.95	-0.266945
8993	PGLYRP1	2067.74	-0.267147
221188	GPR114	1587.73	-0.267376
83666	PARP9	1992.99	-0.267413
285367	RPUSD3	2349.02	-0.26745
5435	POLR2F	1969.2	-0.267873
10096	ACTR3	2087.65	-0.268098
8233	ZRSR2	2186.66	-0.268406
7167	TPI1	2778.96	-0.268461
23225	NUP210	2536.3	-0.268771
3654	IRAK1	2637.59	-0.268974
10528	NOP56	2738.85	-0.269488
7016	TESK1	2673.88	-0.269938
3117	HLA-DQA1	1279.45	-0.269954
55876	GSDMB	2104.89	-0.270131
22928	SEPHS2	2633.29	-0.270211
83888	FGFBP2	841.186	-0.270254
3344	FOXN2	2499.58	-0.270313
83463	MXD3	2744.06	-0.270322
91355	LRP5L	2517.23	-0.270528
4704	NDUFA9	2638.85	-0.270925
951	CD37	2377.39	-0.271528
10641	NPRL2	2603.15	-0.271859
4913	NTHL1	2456.91	-0.271986
9978	RBX1	2269.32	-0.272429
11021	RAB35	2507.82	-0.272451
10330	CNPY2	2356.68	-0.272504
79001	VKORC1	2309.22	-0.272676
54440	SASH3	2124.47	-0.272808
50485	SMARCAL1	2763.47	-0.27287
7284	TUFM	2641.65	-0.27326
1465	CSRP1	2036.85	-0.2736
93594	WDR67	2569.59	-0.274219
222229	LRWD1	2536.57	-0.274412
133	ADM	2108.35	-0.274717
1476	CSTB	2252.58	-0.274757
6147	RPL23A	2252.71	-0.275021
149628	PYHIN1	1185.29	-0.275239
1609	DGKQ	2322.92	-0.275668
1603	DAD1	2503.75	-0.276082
29988	SLC2A8	2187.94	-0.276177
84790	TUBA1C	2307.74	-0.27634
7644	ZNF91	2024.31	-0.276832
1762	DMWD	1914.36	-0.276884
30833	NT5C	2651.57	-0.2772
11322	TMC6	2476.03	-0.277202
3398	ID2	1601.04	-0.277403
2584	GALK1	2244.85	-0.277406
51282	SCAND1	2380.87	-0.277459
10555	AGPAT2	2663.18	-0.278445
51181	DCXR	1979.11	-0.278458
822	CAPG	2006.08	-0.278526
634	CEACAM1	2534.89	-0.278919
2793	GNGT2	2564.95	-0.27931
10263	CDK2AP2	1918.51	-0.279459
1471	CST3	2197.5	-0.279949
85025	TMEM60	2492.62	-0.2806
55624	POMGNT1	2156.93	-0.280663
51203	NUSAP1	2634.9	-0.280699
124446	TMEM219	2473.76	-0.281388
6176	RPLP1	2200.71	-0.281422
3437	IFIT3	1237.85	-0.281481
58485	TRAPPC1	2568.19	-0.281786
4939	OAS2	1149.8	-0.282128
10452	TOMM40	2253.28	-0.282223
4713	NDUFB7	1545.9	-0.28289
5294	PIK3CG	1770.81	-0.283157
387882	C12orf75	1733.62	-0.283965
22913	RALY	2697.89	-0.284034
1650	DDOST	2527.87	-0.284044
2079	ERH	2056.67	-0.284686
84817	TXNDC17	2577.79	-0.284688
5721	PSME2	2741.63	-0.284866
10682	EBP	1749.61	-0.284905
2219	FCN1	2733.16	-0.284918
1072	CFL1	2170.22	-0.285005
6628	SNRPB	2765.95	-0.285318
79102	RNF26	2526.32	-0.285404
3134	HLA-F	2114.76	-0.285423
55009	C19orf24	2323.15	-0.285423
930	CD19	1964.09	-0.285763
51374	C2orf28	2739.49	-0.286156
51005	AMDHD2	2534.9	-0.286186
56935	C11orf75	2292.48	-0.286292
10809	STARD10	2343.69	-0.286295
51142	CHCHD2	2623.92	-0.286777
10376	TUBA1B	2331.51	-0.287506
57407	NMRAL1	2287.25	-0.288355
9482	STX8	2124.31	-0.288497
29097	CNIH4	2153.96	-0.288514
10538	BATF	1600.76	-0.288692
60489	APOBEC3G	1860.68	-0.288756
65990	FAM173A	1762.53	-0.289539
241	ALOX5AP	2404.07	-0.289573
51637	C14orf166	2323.27	-0.28978
128346	C1orf162	2133.26	-0.290083
284004	HEXDC	2172.58	-0.290513
9049	AIP	2801.49	-0.29054
26001	RNF167	1976.3	-0.290588
55272	IMP3	2364.76	-0.290678
7295	TXN	2072.64	-0.290836
51155	HN1	2053.81	-0.291014
5702	PSMC3	2634.79	-0.291627
432	ASGR1	2373.83	-0.291703
286257	C9orf142	1831.57	-0.291715
6150	MRPL23	2248.82	-0.291816
5757	PTMA	1384.99	-0.292015
84941	HSH2D	1866.17	-0.292087
118881	COMTD1	2745.16	-0.292391
3704	ITPA	2621.43	-0.292465
56949	XAB2	2753.44	-0.29345
22921	MSRB2	2333.64	-0.293491
79672	FN3KRP	2037.06	-0.29358
83590	TMUB1	2226.48	-0.293718
84065	TMEM222	2772.18	-0.293821
8721	EDF1	2141.27	-0.293928
54958	TMEM160	1312.55	-0.293981
79174	CRELD2	2129.68	-0.294025
79171	RBM42	2783	-0.294458
274	BIN1	1314.75	-0.29449
57175	CORO1B	2716.61	-0.29451
553115	PEF1	2621.47	-0.294558
7096	TLR1	2498.83	-0.294734
55013	CCDC109B	2757.09	-0.295176
5499	PPP1CA	2660.19	-0.295517
440400	RNASEK	2333.04	-0.295549
8896	BUD31	2723.01	-0.29562
8986	RPS6KA4	2642.41	-0.29606
899	CCNF	1764.7	-0.29653
28952	CCDC22	2795.4	-0.296649
3108	HLA-DMA	2227.73	-0.296652
29924	EPN1	2498.54	-0.296803
4258	MGST2	2627.28	-0.296935
55741	EDEM2	2297.16	-0.296962
79622	SNRNP25	2533.04	-0.297203
27089	UQCRQ	2567.89	-0.297855
124222	PAQR4	2421.82	-0.297894
3002	GZMB	761.815	-0.298087
2647	BLOC1S1	2549.12	-0.29818
5216	PFN1	2262.55	-0.298322
6636	SNRPF	2568.31	-0.298477
6352	CCL5	1550.81	-0.298597
9446	GSTO1	2776.65	-0.298677
6590	SLPI	2581.97	-0.298681
79961	DENND2D	2520.39	-0.298711
79004	CUEDC2	2785.85	-0.299198
127703	C1orf216	2789.49	-0.299201
283991	FAM100B	2631.21	-0.299507
6890	TAP1	2330.32	-0.299618
27238	GPKOW	2480.24	-0.299907
8772	FADD	2708.51	-0.300135
219285	SAMD9L	1221.94	-0.300741
51337	C8orf55	2646.31	-0.301199
112770	C1orf85	2420.7	-0.301257
8968	HIST1H3F	2240.87	-0.301511
11068	CYB561D2	2694.89	-0.301677
90231	KIAA2013	2301.06	-0.30191
25864	ABHD14A	2028.97	-0.301994
9985	REC8	2265.2	-0.302492
23589	CARHSP1	2071.13	-0.302582
11151	CORO1A	2325.11	-0.30261
84958	SYTL1	2535.39	-0.302826
51693	TRAPPC2L	1903.83	-0.302885
2271	FH	1955.67	-0.302897
9349	RPL23	1886.11	-0.302916
26020	LRP10	2132.77	-0.303336
5133	PDCD1	1939.95	-0.303452
29937	NENF	2327.66	-0.303495
1337	COX6A1	2378.51	-0.303698
5714	PSMD8	2554.42	-0.303986
27240	SIT1	2073.49	-0.304343
9046	DOK2	2204.71	-0.30469
154467	CCDC167	2077.87	-0.304877
6185	RPN2	1711.64	-0.304888
126208	ZNF787	2039.42	-0.304983
4277	MICB	1384.46	-0.305098
28976	ACAD9	2578.09	-0.305209
10970	CKAP4	2561.15	-0.305251
79016	DDA1	1828.98	-0.305348
2357	FPR1	2317.35	-0.305444
2014	EMP3	1659.86	-0.306088
84885	ZDHHC12	2326.99	-0.306316
10953	TOMM34	2547.38	-0.306355
914	CD2	1666.05	-0.306553
79142	PHF23	2620.82	-0.306686
26012	NELF	1387.87	-0.306716
319085	ITPK1-AS1	1825.94	-0.307218
3162	HMOX1	1787.47	-0.307362
6222	RPS18	2410.91	-0.307442
342357	ZKSCAN2	1960.12	-0.307577
353514	LILRA5	1499.65	-0.307743
55020	TTC38	1158.24	-0.30808
2597	GAPDH	2086.84	-0.30821
8666	EIF3G	1822.18	-0.308397
1666	DECR1	1919.77	-0.308593
10654	PMVK	2719.03	-0.308603
54785	C17orf59	2399.48	-0.309254
4191	MDH2	2307.09	-0.309509
7277	TUBA4A	1485.54	-0.309769
6277	S100A6	1469.46	-0.309837
8260	NAA10	2198.81	-0.310183
388564	TMEM238	2174.62	-0.310661
81628	TSC22D4	2622.01	-0.310843
51079	NDUFA13	2270.36	-0.310849
55365	TMEM176A	740.691	-0.310915
53	ACP2	2788.05	-0.311147
5695	PSMB7	1699.04	-0.311225
11145	PLA2G16	1597.4	-0.311738
2950	GSTP1	2187.67	-0.311808
51253	MRPL37	2368.99	-0.312098
55651	NHP2	2523.19	-0.312144
11315	PARK7	1677.14	-0.312176
387066	SNHG5	2270.9	-0.312198
51657	STYXL1	2686.77	-0.312482
6641	SNTB1	2758.02	-0.312586
6015	RING1	2049.69	-0.312897
10459	MAD2L2	2051.47	-0.312923
25865	PRKD2	2419.7	-0.312932
23246	BOP1	1949.28	-0.313611
3035	HARS	2806.26	-0.313632
475	ATOX1	2631.7	-0.313984
2879	GPX4	2273.22	-0.313991
3001	GZMA	1185.15	-0.314004
55505	NOP10	2172.5	-0.314385
6472	SHMT2	2747.05	-0.314637
51251	NT5C3	1769.65	-0.315015
6155	RPL27	2702.95	-0.31513
8638	OASL	731.487	-0.315595
925	CD8A	1053.7	-0.315739
6392	SDHD	2778.09	-0.31609
23381	SMG5	2096.49	-0.316333
1351	COX8A	2324.52	-0.316386
116071	BATF2	2537.95	-0.316759
7376	NR1H2	2798.03	-0.317353
23583	SMUG1	2731.06	-0.317549
2787	GNG5	1987.58	-0.31792
533	ATP6V0B	2427.96	-0.318081
539	ATP5O	2758.88	-0.318085
116541	MRPL54	2133.3	-0.318189
56666	PANX2	2336.68	-0.318613
3695	ITGB7	1653.83	-0.318617
80301	PLEKHO2	1998.72	-0.319057
64975	MRPL41	1763.74	-0.319125
118472	ZNF511	2509.94	-0.319132
4494	MT1F	1039.23	-0.319217
6282	S100A11	1402.02	-0.319249
51303	FKBP11	2255.8	-0.319286
55008	HERC6	468.903	-0.319668
2867	FFAR2	2152.67	-0.320083
5351	PLOD1	2438.62	-0.32015
51659	GINS2	2166.25	-0.320619
85441	PRIC285	1577.26	-0.320668
5920	RARRES3	1581.8	-0.320918
5705	PSMC5	1610.99	-0.321308
9551	ATP5J2	2327.35	-0.321537
57414	RHBDD2	2437.39	-0.322155
3560	IL2RB	1748.83	-0.322385
4343	MOV10	1406.74	-0.322459
10465	PPIH	2552.5	-0.322858
57418	WDR18	2345.45	-0.323325
10871	CD300C	2161.88	-0.323563
8175	SF3A2	2793.25	-0.323833
6948	TCN2	1769.09	-0.323846
25796	PGLS	2374.46	-0.323856
9212	AURKB	2508.51	-0.323901
11033	ADAP1	2588.44	-0.323972
51647	FAM96B	2510.72	-0.324182
64005	MYO1G	1540.48	-0.324763
8892	EIF2B2	2201.23	-0.325073
6237	RRAS	1400.87	-0.325113
4542	MYO1F	2150.81	-0.325117
6688	SPI1	2063.91	-0.325131
5931	RBBP7	1654.32	-0.325484
1973	EIF4A1	2489.57	-0.325933
201254	STRA13	2747.13	-0.326526
10578	GNLY	1576.99	-0.326862
64960	MRPS15	2597.91	-0.328182
91543	RSAD2	450.95	-0.328199
374403	TBC1D10C	2589.11	-0.328384
125875	CLDND2	793.056	-0.328406
64651	CSRNP1	2364.85	-0.328678
84987	COX14	2044.25	-0.328895
79077	DCTPP1	1680.25	-0.3289
10897	YIF1A	1683.09	-0.32901
84310	C7orf50	1278.63	-0.331476
408	ARRB1	2724.25	-0.332134
51530	ZC3HC1	2766.1	-0.332281
57761	TRIB3	1636.6	-0.332602
8740	TNFSF14	2345.77	-0.333495
9470	EIF4E2	2248.51	-0.333631
7873	MANF	2194.43	-0.334286
124044	SPATA2L	2036.96	-0.334325
2495	FTH1	1900.11	-0.334544
55819	RNF130	2423.21	-0.334773
8655	DYNLL1	1656.5	-0.334885
51081	MRPS7	2234.07	-0.335002
10467	ZNHIT1	2504.71	-0.335003
4783	NFIL3	1857.07	-0.335225
1329	COX5B	2286.74	-0.335489
975	CD81	1536.63	-0.33553
374882	TMEM205	2445.5	-0.335744
5902	RANBP1	1900	-0.335872
2197	FAU	2101.55	-0.335873
710	SERPING1	1979.35	-0.335922
151903	CCDC12	2481.67	-0.336292
79005	SCNM1	2654.46	-0.336556
2783	GNB2	2363.84	-0.336712
79415	C17orf62	2185.38	-0.337424
51504	TRMT112	1590.81	-0.337563
11331	PHB2	2044.41	-0.338021
27301	APEX2	2029.7	-0.338456
140823	ROMO1	1832.89	-0.338533
10908	PNPLA6	2562.75	-0.338709
55337	C19orf66	1520.24	-0.338739
1958	EGR1	2138.57	-0.339092
8673	VAMP8	2229.91	-0.33911
5436	POLR2G	2431.3	-0.339633
6130	RPL7A	1445.98	-0.339674
55080	TAPBPL	2491.51	-0.340021
1241	LTB4R	2636.51	-0.340078
8045	RASSF7	2348.95	-0.34019
51258	MRPL51	2041.8	-0.340369
79713	IGFLR1	2304.47	-0.340928
23625	FAM89B	2454.06	-0.341039
4818	NKG7	1296.72	-0.341108
391	RHOG	2437.4	-0.341294
51545	ZNF581	2690.45	-0.341704
746	C11orf10	2366.87	-0.342209
64761	PARP12	1144.13	-0.342666
9368	SLC9A3R1	1491.56	-0.343501
11284	PNKP	2722.79	-0.344045
64978	MRPL38	1570.18	-0.344222
5610	EIF2AK2	838.914	-0.344359
968	CD68	2529.15	-0.344392
26255	PTTG3P	1244.91	-0.344597
1535	CYBA	2126.54	-0.345277
50619	DEF6	2466.48	-0.345398
6280	S100A9	2206.86	-0.345416
51035	UBXN1	2595.19	-0.345416
57140	RNPEPL1	2632.05	-0.34549
8192	CLPP	2450.67	-0.346075
6390	SDHB	2562.84	-0.346166
340061	TMEM173	2238.64	-0.346431
513	ATP5D	2247.85	-0.346529
11314	CD300A	2124.11	-0.347085
3628	INPP1	2662.01	-0.347095
2999	GZMH	829.577	-0.347479
430	ASCL2	1420.55	-0.348295
19	ABCA1	1673.71	-0.34839
79792	GSDMD	2351.05	-0.348419
4696	NDUFA3	2144.36	-0.348688
3956	LGALS1	1113.92	-0.348848
79581	SLC52A2	2340.68	-0.349185
5050	PAFAH1B3	1942.66	-0.349219
27351	PPPDE2	2048.1	-0.349272
6748	SSR4	1827.95	-0.350322
10078	TSSC4	2770.75	-0.350971
170575	GIMAP1	1422.1	-0.35119
1050	CEBPA	1827.39	-0.351891
10870	HCST	1276.65	-0.35286
84975	MFSD5	2083.18	-0.353171
5300	PIN1	1690.5	-0.353335
27166	PRELID1	1846.81	-0.353829
54512	EXOSC4	2322.07	-0.3539
84876	ORAI1	2118.48	-0.354083
1084	CEACAM3	2613.35	-0.354275
11253	MAN1B1	2267.17	-0.354294
978	CDA	1386.53	-0.355489
9045	RPL14	1202.38	-0.355797
10226	PLIN3	2079.72	-0.355932
8364	HIST1H4C	1896.1	-0.357067
54976	C20orf27	1700.93	-0.357277
9296	ATP6V1F	1997.99	-0.357382
29802	VPREB3	1864.45	-0.357582
54998	AURKAIP1	1881.35	-0.358137
4708	NDUFB2	2747.68	-0.358289
51428	DDX41	2613.69	-0.358526
126328	NDUFA11	1846.13	-0.358749
8530	CST7	900.49	-0.359671
54732	TMED9	1442.79	-0.36141
1020	CDK5	1737.9	-0.361535
113829	SLC35A4	2476.19	-0.362006
10417	SPON2	2038.88	-0.362163
10237	SLC35B1	2489.58	-0.362225
1043	CD52	1562.04	-0.363027
10561	IFI44	521.003	-0.363255
11224	RPL35	2416.06	-0.363415
51316	PLAC8	1652.09	-0.363442
6902	TBCA	2763.65	-0.363661
2537	IFI6	646.028	-0.36378
26284	ERAL1	2462.93	-0.363986
112616	CMTM7	2212.06	-0.364713
9158	FIBP	2215.51	-0.364895
4794	NFKBIE	2666.25	-0.365353
348262	FAM195B	1842.46	-0.365794
6723	SRM	2230.81	-0.365862
441168	FAM26F	2601.39	-0.365893
400759	GBP1P1	2616.37	-0.365901
1019	CDK4	2127.11	-0.366221
79763	ISOC2	1390.39	-0.367072
127687	C1orf122	2116.95	-0.367572
6689	SPIB	2305.93	-0.369136
79705	LRRK1	2741.53	-0.369178
10430	TMEM147	2033.56	-0.369341
10616	RBCK1	2075.91	-0.369474
55803	ADAP2	1955.42	-0.370216
23423	TMED3	2470.61	-0.370905
1053	CEBPE	2709.93	-0.371027
2021	ENDOG	2290.08	-0.371958
2207	FCER1G	1207.51	-0.372498
160364	CLEC12A	633.206	-0.372748
51107	APH1A	1794.79	-0.372835
84304	NUDT22	2689.04	-0.374991
3101	HK3	2710.18	-0.37514
112483	SAT2	2016.19	-0.375431
127943	FCRLB	2475.8	-0.375672
79081	C11orf48	2256.71	-0.376353
27315	PGAP2	2612.09	-0.376584
54739	XAF1	759.785	-0.376717
10410	IFITM3	986.274	-0.376894
580	BARD1	2624.42	-0.377107
56005	C19orf10	1851.4	-0.377359
3310	HSPA6	1772.89	-0.377705
3135	HLA-G	749.996	-0.377712
9363	RAB33A	2182.27	-0.378232
374395	TMEM179B	1956.47	-0.378418
4502	MT2A	738.858	-0.378738
1522	CTSZ	2235.12	-0.379726
8519	IFITM1	1190.55	-0.380473
28974	C19orf53	2313	-0.381314
4706	NDUFAB1	1814.2	-0.381385
9377	COX5A	1687.72	-0.381634
64951	MRPS24	2359.85	-0.382326
28960	DCPS	1535	-0.382803
7083	TK1	1919.56	-0.38286
85014	TMEM141	2379.52	-0.383151
257101	ZNF683	370.501	-0.383537
51537	MTFP1	2522.26	-0.383691
84276	NICN1	2238.88	-0.383764
57819	LSM2	1705.16	-0.384131
29108	PYCARD	1992.37	-0.384172
54344	DPM3	2167.37	-0.384402
29085	PHPT1	1099.15	-0.384541
400916	CHCHD10	1775.08	-0.384905
695	BTK	1858.6	-0.385345
84681	HINT2	2164.86	-0.386071
84934	C12orf52	2219.19	-0.386225
8698	S1PR4	1822.76	-0.387425
2015	EMR1	1832.87	-0.387999
79156	PLEKHF1	892.283	-0.388347
51255	RNF181	1845.08	-0.38848
51293	CD320	2085.07	-0.388481
83443	SF3B5	2538.97	-0.38851
84106	PRAM1	2626.99	-0.388569
929	CD14	2420.38	-0.389173
284422	C19orf77	1327.2	-0.389493
81873	ARPC5L	1747.79	-0.389924
118788	PIK3AP1	1230.72	-0.389955
55577	NAGK	1639.59	-0.390799
51092	SIDT2	1547.21	-0.392172
10866	HCP5	1285.26	-0.39238
162989	DEDD2	2285.28	-0.392474
115817	DHRS1	2096.76	-0.392819
719	C3AR1	1432.16	-0.394547
1890	TYMP	2092.75	-0.394692
57085	AGTRAP	1901.89	-0.39521
88745	RRP36	1928.66	-0.397062
1521	CTSW	1153.14	-0.397107
54539	NDUFB11	1700.75	-0.398342
3240	HP	2643.78	-0.398969
8337	HIST2H2AA3	1162.82	-0.399932
83862	TMEM120A	1918.83	-0.400258
51246	SHISA5	847.418	-0.400408
81605	URM1	1952.68	-0.400446
25798	BRI3	1816.65	-0.402097
9232	PTTG1	1097.65	-0.402241
6182	MRPL12	2185.25	-0.402264
83982	IFI27L2	1318.65	-0.402379
7100	TLR5	1670.77	-0.403001
65992	DDRGK1	1622.24	-0.403773
5355	PLP2	2593.93	-0.403823
11000	SLC27A3	1974.5	-0.403899
2896	GRN	1706.18	-0.404477
51225	ABI3	1046.5	-0.404526
9450	LY86	1808.12	-0.40542
100	ADA	1378.45	-0.405574
641649	TMEM91	1945.22	-0.406096
3725	JUN	2496.76	-0.406781
147807	ZNF524	1883.19	-0.407693
1512	CTSH	2423.63	-0.408076
4005	LMO2	980.352	-0.408473
29950	SERTAD1	2025.13	-0.408634
254863	C17orf61	2192.32	-0.409632
389	RHOC	1062.58	-0.409673
56905	C15orf39	2692.85	-0.409724
5438	POLR2I	1697.27	-0.411459
2769	GNA15	2428.23	-0.411961
54923	LIME1	973.198	-0.412396
4728	NDUFS8	1259.14	-0.412539
113130	CDCA5	1892.38	-0.413002
51690	LSM7	2122.75	-0.413511
3430	IFI35	1024.88	-0.414909
166012	CHST13	1502.08	-0.415078
5190	PEX6	2605.39	-0.415086
64108	RTP4	690.361	-0.41602
54	ACP5	1337.99	-0.417449
10589	DRAP1	1442.75	-0.417621
7386	UQCRFS1	1880.23	-0.41774
128240	APOA1BP	2105.19	-0.41776
3418	IDH2	991.595	-0.419533
4814	NINJ1	2747.81	-0.419625
3965	LGALS9	1449.29	-0.420535
4717	NDUFC1	2733.48	-0.420601
83416	FCRL5	2804.63	-0.422362
8778	SIGLEC5	1711.78	-0.422696
83638	C11orf68	1883.87	-0.422772
51368	TEX264	1611.77	-0.42301
578	BAK1	1513.24	-0.423027
81030	ZBP1	700.785	-0.423206
10287	RGS19	1709.44	-0.423876
125988	C19orf70	1530.59	-0.424509
93343	FAM125A	1811.73	-0.42493
10964	IFI44L	296.885	-0.427484
6234	RPS28	663.943	-0.42919
10791	VAMP5	1613.75	-0.429412
10567	RABAC1	1903.25	-0.430419
2242	FES	2524.41	-0.430598
192286	HIGD2A	1364.68	-0.435095
81618	ITM2C	1513.45	-0.435537
10549	PRDX4	1557.82	-0.435958
81620	CDT1	2649.57	-0.436391
266747	RGL4	2394.65	-0.436425
79037	PVRIG	1083.05	-0.43729
54935	DUSP23	1755.21	-0.439125
80148	PQLC1	1046.25	-0.440115
7841	MOGS	1303.49	-0.4407
84316	LSMD1	2047.62	-0.441553
6036	RNASE2	421.705	-0.442343
11047	ADRM1	2074.1	-0.450568
23480	SEC61G	1825.09	-0.452994
4318	MMP9	1590.63	-0.453199
28956	LAMTOR2	1643.79	-0.453792
80851	SH3BP5L	1379.82	-0.457377
140465	MYL6B	1768.93	-0.45788
11126	CD160	914.638	-0.458087
256281	NUDT14	1197.61	-0.459441
51042	ZNF593	1570.34	-0.459958
2731	GLDC	2165.98	-0.460266
5538	PPT1	1795.57	-0.460281
126014	OSCAR	1808.57	-0.460561
79132	DHX58	1074.39	-0.46162
2804	GOLGB1	858.167	-0.462089
8270	LAGE3	1979.36	-0.463317
728489	DNLZ	2226.32	-0.463462
9381	OTOF	360.09	-0.464578
6881	TAF10	1970.8	-0.465989
1537	CYC1	1490.42	-0.472867
64757	2017-03-01	1605.28	-0.477074
3728	JUP	2216.67	-0.477971
684	BST2	876.826	-0.484503
924	CD7	1520.78	-0.489744
1844	DUSP2	2264	-0.490384
58986	TMEM8A	1904.28	-0.491737
7298	TYMS	1192.7	-0.491925
401115	C4orf48	880.593	-0.492656
83938	C10orf11	1993.76	-0.494139
3113	HLA-DPA1	1992.11	-0.496091
8226	HDHD1	2356.5	-0.496358
151306	GPBAR1	885.707	-0.498836
26270	FBXO6	791.631	-0.5039
3902	LAG3	618.225	-0.503929
84680	ACCS	1195.34	-0.505509
4282	MIF	976.328	-0.50838
200942	KLHDC8B	727.439	-0.515925
26010	SPATS2L	278.231	-0.519912
9941	EXOG	594.402	-0.522045
3512	IGJ	704.386	-0.52245
644	BLVRA	623.862	-0.523236
57130	ATP13A1	611.741	-0.523999
79873	NUDT18	920.893	-0.52534
4255	MGMT	1720.36	-0.526476
116362	RBP7	2421.74	-0.527051
338758	LOC338758	2769.3	-0.52897
4716	NDUFB10	577.568	-0.529029
29901	SAC3D1	2308.3	-0.533752
9636	ISG15	259.818	-0.534496
64847	SPATA20	2375.15	-0.535608
54436	SH3TC1	2149.17	-0.53768
23593	HEBP2	1167.56	-0.538259
116448	OLIG1	1862.86	-0.538772
90701	SEC11C	1265.51	-0.544597
3576	IL8	2538.42	-0.545988
5790	PTPRCAP	517.458	-0.564886
3665	IRF7	762.541	-0.566041
10215	OLIG2	1689.19	-0.573172
1164	CKS2	2405.83	-0.580533
1117	CHI3L2	1724.57	-0.595119
1178	CLC	1024.19	-0.596674
23753	SDF2L1	718.43	-0.602778
51237	MZB1	985.224	-0.606217
4061	LY6E	260.351	-0.607156
3004	GZMM	329.909	-0.608188
8365	HIST1H4H	738.303	-0.625425
991	CDC20	552.418	-0.645228
9997	SCO2	982.279	-0.652977
51020	HDDC2	1629.79	-0.659904
57801	HES4	187.1	-0.665998
3959	LGALS3BP	238.575	-0.686946
400709	SIGLEC16	2757.95	-0.688885
10917	BTNL3	2485.73	-0.690408
284415	VSTM1	2179.53	-0.720303
952	CD38	562.8	-0.723494
165530	CLEC4F	1191.19	-0.734423
260429	PRSS33	1523.54	-0.73921
9022	CLIC3	413.968	-0.75954
26519	TIMM10	289.632	-0.804127
7503	XIST	654.15	-0.879091
6368	CCL23	1219.56	-0.929659
3429	IFI27	35.6118	-0.948905

## Sheet: Table S2B
Table S2B: All the DEGs in nonprogressors of CD4+ T cells
EntrezID	Name	CombinedRP	AveLogFC
4900	NRGN	2169.79	1.14554
728	C5AR1	1746.85	0.810784
8970	HIST1H2BJ	1114.9	0.77945
5055	SERPINB2	735.399	0.707027
6624	FSCN1	1996.09	0.65436
3820	KLRB1	858.287	0.595801
5081	PAX7	1463.53	0.552383
1397	CRIP2	1225.72	0.529365
7169	TPM2	1739.23	0.497764
1968	EIF2S3	1542.48	0.466752
50856	CLEC4A	1556.7	0.461016
6653	SORL1	1574.25	0.458334
7057	THBS1	468.71	0.433853
1975	EIF4B	721.641	0.432218
54541	DDIT4	462.777	0.426828
53635	PTOV1	1510.72	0.426092
29944	PNMA3	925.621	0.424948
8807	IL18RAP	920.734	0.420523
3315	HSPB1	799.257	0.41583
3613	IMPA2	2259.89	0.412035
56165	TDRD1	599.976	0.409822
6688	SPI1	1812.26	0.407492
51296	SLC15A3	1353.09	0.392892
51386	EIF3L	981.359	0.391391
9021	SOCS3	817.427	0.38921
6352	CCL5	314.055	0.384727
9249	DHRS3	1020.98	0.376205
7644	ZNF91	1582.46	0.374617
126299	ZNF428	757.9	0.372258
51614	ERGIC3	1480.31	0.37098
7049	TGFBR3	512.911	0.367883
1027	CDKN1B	408.717	0.362731
10140	TOB1	558.588	0.355868
2091	FBL	1180.06	0.351525
10628	TXNIP	367.646	0.345496
3385	ICAM3	1718.08	0.342707
3726	JUNB	1264.23	0.342187
10219	KLRG1	621.851	0.341296
221692	PHACTR1	1738.68	0.331623
2117	ETV3	1782	0.330629
11025	LILRB3	2080.25	0.321532
7832	BTG2	464.673	0.318898
2053	EPHX2	1339.85	0.310767
912	CD1D	1815.4	0.308275
6124	RPL4	838.707	0.307175
10644	IGF2BP2	2007.33	0.301949
8651	SOCS1	1303.87	0.299913
25797	QPCT	1849.13	0.295875
4753	NELL2	1612.34	0.292117
8440	NCK2	1263.52	0.287079
1514	CTSL1	1572.35	0.279414
9289	GPR56	795.123	0.275377
9181	ARHGEF2	1412.52	0.274226
201895	C4orf34	1922.38	0.273306
3337	DNAJB1	307.2	0.267349
3707	ITPKB	1326.41	0.267094
3065	HDAC1	1578.41	0.263587
29933	GPR132	2405.66	0.263136
80162	ATHL1	363.184	0.263134
54923	LIME1	1810.26	0.262478
948	CD36	1835.33	0.254718
10225	CD96	1644.68	0.253299
250	ALPP	1339.94	0.252644
4125	MAN2B1	2183.81	0.252172
678	ZFP36L2	740.748	0.250008
7351	UCP2	733.553	0.247588
83442	SH3BGRL3	1315.3	0.246899
3678	ITGA5	2398.35	0.245092
6233	RPS27A	794.912	0.241869
923	CD6	1638.1	0.241529
5210	PFKFB4	2315.97	0.239186
2352	FOLR3	1167.98	0.235184
1236	CCR7	1002.19	0.223223
677	ZFP36L1	1694.99	0.222568
22918	CD93	1753.88	0.221595
92017	SNX29	2276.5	0.220611
23015	GOLGA8A	1037.26	0.219498
6347	CCL2	1305.81	0.218679
79693	YRDC	832.091	0.217331
26030	PLEKHG3	1371.16	0.217157
2113	ETS1	750.781	0.216885
8530	CST7	707.383	0.216298
3615	IMPDH2	1461.41	0.214525
9806	SPOCK2	1422.7	0.213339
80335	WDR82	1584.52	0.210976
2876	GPX1	2202.65	0.208001
9214	FAIM3	766.349	0.207269
4245	MGAT1	1276.43	0.206581
924	CD7	1755.88	0.20481
4092	SMAD7	1835.87	0.202036
3458	IFNG	875.144	0.201681
10320	IKZF1	697.217	0.201147
23344	ESYT1	1265.88	0.197171
9516	LITAF	1065.21	0.196468
2272	FHIT	1508.18	0.194294
6775	STAT4	1223.11	0.194121
6160	RPL31	861.565	0.193174
7994	KAT6A	1480.56	0.191366
3683	ITGAL	1440.9	0.19015
9208	LRRFIP1	733.807	0.188141
3720	JARID2	1596.34	0.185128
58986	TMEM8A	2346.08	0.183336
25777	SUN2	1774.99	0.176392
6189	RPS3A	977.606	0.175208
9710	KIAA0355	1261.54	0.172824
9235	IL32	895.464	0.172557
55819	RNF130	2424.93	0.171231
7263	TST	2225.19	0.170218
114791	TUBGCP5	2435.73	0.170197
3394	IRF8	1261.63	0.168651
116496	FAM129A	1661.19	0.168064
4833	NME4	1554.94	0.166797
894	CCND2	1635.42	0.166293
11118	BTN3A2	1229.03	0.16612
7277	TUBA4A	1395.06	0.164569
5734	PTGER4	1229.46	0.164408
11039	SMA4	1454.08	0.162924
1396	CRIP1	1250.01	0.162458
9647	PPM1F	1846.07	0.162028
83955	NACAP1	1632.83	0.160792
56911	C21orf7	1803.44	0.157701
5790	PTPRCAP	964.236	0.15756
3702	ITK	1193.09	0.156997
713	C1QB	2105.48	0.152297
914	CD2	736.724	0.152054
123	PLIN2	1230.52	0.15105
9397	NMT2	1319.88	0.149913
2867	FFAR2	1741.47	0.148666
9744	ACAP1	1313.84	0.148593
9054	NFS1	1511.4	0.148311
6129	RPL7	1158.83	0.147076
3557	IL1RN	1071.5	0.146768
6844	VAMP2	1720.9	0.145321
55340	GIMAP5	776.439	0.144397
28984	RGCC	1256.44	0.144322
6916	TBXAS1	1514.32	0.144259
7766	ZNF223	1493.54	0.144076
969	CD69	854.397	0.143467
921	CD5	1244.57	0.143347
54855	FAM46C	1044.3	0.14249
9349	RPL23	817.477	0.142129
3552	IL1A	1849.6	0.141304
6191	RPS4X	1227.67	0.140918
3001	GZMA	634.344	0.14014
115207	KCTD12	1749.83	0.139589
404093	CUEDC1	2123.6	0.13846
53637	S1PR5	1232.64	0.138308
3587	IL10RA	1681.86	0.136524
4034	LRCH4	1215.9	0.134664
6130	RPL7A	1031.93	0.133399
23521	RPL13A	957.943	0.12973
11322	TMC6	1441.98	0.129259
2534	FYN	1663.86	0.128778
5869	RAB5B	1399.99	0.128076
80305	TRABD	2062.99	0.125267
3945	LDHB	1029.23	0.12525
154	ADRB2	1882.95	0.124651
6181	RPLP2	1749.72	0.123973
5583	PRKCH	1634.06	0.123244
83716	CRISPLD2	1885.7	0.122339
114548	NLRP3	706.976	0.121769
7124	TNF	712.899	0.119892
55544	RBM38	1641.64	0.119376
3659	IRF1	2099.65	0.118901
1385	CREB1	660.839	0.115991
4478	MSN	1693.54	0.115374
55793	FAM63A	607.977	0.114757
6430	SRSF5	974.308	0.113799
3710	ITPR3	2262.87	0.113258
1937	EEF1G	1588.04	0.113205
64170	CARD9	1707.8	0.110191
51561	IL23A	1689.74	0.109438
2683	B4GALT1	1727.63	0.108944
84830	ADTRP	1687.6	0.107064
64231	MS4A6A	1317.74	0.106973
2026	ENO2	1631.78	0.106913
2242	FES	1682.87	0.103919
8536	CAMK1	1926	0.103528
6144	RPL21	1294.12	0.102106
55893	ZNF395	1405.17	0.101361
138151	NACC2	2061.97	0.100397
56848	SPHK2	2252.38	0.099788
1508	CTSB	2355.23	0.0993299
9045	RPL14	1546.72	0.0977551
7852	CXCR4	1327.7	0.0966835
23166	STAB1	2298.27	0.0958179
9819	TSC22D2	1927.89	0.0955184
1509	CTSD	2342.33	0.0952377
127544	RNF19B	1875.71	0.0945768
9368	SLC9A3R1	1647.27	0.0945765
55142	HAUS2	1643.58	0.0940183
5037	PEBP1	1288.64	0.0938234
6752	SSTR2	1312.28	0.0933915
93081	TEX30	1083.67	0.0915341
10161	LPAR6	1385.45	0.0915278
3192	HNRNPU	1410.21	0.0906768
7718	ZNF165	1337.87	0.0881489
7130	TNFAIP6	1357.97	0.0867568
1545	CYP1B1	1911.29	0.0864046
916	CD3E	1309.05	0.085524
6188	RPS3	1714.36	0.0843691
2634	GBP2	2225.23	0.0837002
1675	CFD	929.822	0.0814379
5027	P2RX7	1695.92	0.0803801
3561	IL2RG	1585.28	0.0776059
128553	TSHZ2	2438.06	0.0752126
9775	EIF4A3	2382.56	0.073464
9049	AIP	1669.48	0.0728226
19	ABCA1	1264.38	0.0720944
1441	CSF3R	1796.41	0.0707045
3684	ITGAM	2387.63	0.0705216
23240	KIAA0922	1532.05	0.0704017
3133	HLA-E	1223.63	0.0703855
3107	HLA-C	1078.68	0.0699846
1794	DOCK2	1847.11	0.068778
155066	ATP6V0E2	2392.14	0.068188
55201	MAP1S	2132.12	0.065741
11180	WDR6	1468.8	0.0651994
3689	ITGB2	1215.48	0.0634962
3695	ITGB7	1299.98	0.0631828
10871	CD300C	1908.02	0.0629723
80256	FAM214B	2341.87	0.0625732
3779	KCNMB1	1860.32	0.0618207
100	ADA	1450.02	0.0614524
2323	FLT3LG	1602.46	0.0599996
1326	MAP3K8	1360.48	0.0591618
5199	CFP	2176.06	0.0586814
1021	CDK6	2201.26	0.0566741
7941	PLA2G7	1629.56	0.0566523
65108	MARCKSL1	1740.38	0.0565329
23603	CORO1C	2371.84	0.0558641
57107	PDSS2	984.99	0.0552044
6583	SLC22A4	2407.8	0.0550364
274	BIN1	1709.69	0.0541113
5216	PFN1	2170.94	0.0528468
29887	SNX10	2129.9	0.0520819
23466	CBX6	2307.44	0.0520563
64092	SAMSN1	2439.95	0.0515166
9882	TBC1D4	2273.37	0.0514881
10970	CKAP4	1850.64	0.0514281
4124	MAN2A1	2010.38	0.0511441
5292	PIM1	968.68	0.0508942
55619	DOCK10	2145.39	0.0507384
79180	EFHD2	1403.3	0.0482844
7538	ZFP36	1665	0.0478275
10095	ARPC1B	1715.14	0.0470953
57698	KIAA1598	1672.57	0.0466592
10981	RAB32	1725.37	0.0459405
5184	PEPD	2378.75	0.045564
55775	TDP1	1744.14	0.0447732
23258	DENND5A	2025.94	0.0442482
9404	LPXN	1743.81	0.0438231
23580	CDC42EP4	2120.95	0.0433557
54971	BANP	1411.41	0.0432331
60370	AVPI1	2386.58	0.0424938
7494	XBP1	1241.07	0.0423303
1536	CYBB	1488.84	0.0413421
262	AMD1	2425.68	0.0412491
10908	PNPLA6	2352.93	0.0396213
5743	PTGS2	1094.73	0.0384993
8548	BLZF1	1102.26	0.0369312
10938	EHD1	1358.08	0.0360302
2990	GUSB	2273.12	0.0359799
168544	ZNF467	2011.75	0.0355812
7561	ZNF14	768.743	0.0355127
55163	PNPO	2138.85	0.0347882
6355	CCL8	2335.68	0.0346506
11182	SLC2A6	1987.94	0.0294882
22	ABCB7	1985.02	0.0290283
3638	INSIG1	1905.07	0.028793
808	CALM3	2373.06	0.0287043
8884	SLC5A6	1821.24	0.027682
10808	HSPH1	1905.65	0.0274816
9334	B4GALT5	1700.59	0.0267387
8935	SKAP2	2415.86	0.0262786
10570	DPYSL4	1679.13	0.0258884
55280	CWF19L1	1966.69	0.025838
5428	POLG	2199.25	0.02358
5518	PPP2R1A	2179.28	0.0220791
1039	CDR2	2391.05	0.021317
55700	MAP7D1	2398.92	0.0199831
27235	COQ2	2219.7	0.0185089
5008	OSM	1238.62	0.0182609
217	ALDH2	1874.14	0.0181728
2180	ACSL1	2258.88	0.0176542
5464	PPA1	2237.49	0.0172457
9709	HERPUD1	1719.19	0.0162721
8930	MBD4	1337.91	0.0156853
4790	NFKB1	1102.34	0.0154
221037	JMJD1C	1817.86	0.0150784
71	ACTG1	2348.25	0.0134559
3398	ID2	1053.15	0.0128274
301	ANXA1	1255.3	0.0127642
3459	IFNGR1	1978.22	0.012728
11027	LILRA2	2238.2	0.0122927
972	CD74	1678.54	0.0119371
2319	FLOT2	1917.9	0.0112942
6256	RXRA	1271.6	0.00943637
23531	MMD	2402.48	0.00748383
9375	TM9SF2	2410.08	0.00721976
919	CD247	1606.29	0.0065903
2217	FCGRT	1958.01	0.00638718
10866	HCP5	1925.87	0.00555524
29992	PILRA	2206.88	0.00409678
3988	LIPA	1324.35	0.00397158
8031	NCOA4	1979.37	0.00396169
7076	TIMP1	2215.66	0.00359031
1153	CIRBP	2368.8	0.00336741
2720	GLB1	2214.31	0.0018415
8021	NUP214	2260.74	0.000757087
1808	DPYSL2	1236.29	-0.000431264
3055	HCK	2085.77	-0.000634046
23179	RGL1	2114.41	-0.00105762
1880	GPR183	1674.58	-0.00187713
4609	MYC	1176.62	-0.00202718
4267	CD99	1575.52	-0.00232355
6448	SGSH	1662.93	-0.00283396
80342	TRAF3IP3	1493.08	-0.00388383
51278	IER5	2192.47	-0.00450873
10550	ARL6IP5	1538.96	-0.0046064
10383	TUBB4B	1603.28	-0.00512559
3119	HLA-DQB1	1019.73	-0.00542078
55272	IMP3	2345.07	-0.0059487
8764	TNFRSF14	1874.32	-0.0071028
6118	RPA2	1536.34	-0.00713747
3597	IL13RA1	1932.37	-0.00824376
7940	LST1	2123.89	-0.00845018
4318	MMP9	2003.92	-0.00882022
6892	TAPBP	2397.39	-0.00956168
23082	PPRC1	2420.16	-0.0101102
6850	SYK	1055.75	-0.010997
3958	LGALS3	1965.03	-0.0120751
706	TSPO	2010.01	-0.0123409
3957	LGALS2	1473.75	-0.0128763
4778	NFE2	2406.99	-0.0129835
51070	NOSIP	1476.7	-0.0132089
56339	METTL3	2110.09	-0.0133786
1052	CEBPD	1115.33	-0.0141128
1593	CYP27A1	2400.14	-0.0149139
8682	PEA15	1681.42	-0.016723
10295	BCKDK	2272.95	-0.0170527
6431	SRSF6	2018.93	-0.0176944
11040	PIM2	950.241	-0.0177454
1026	CDKN1A	1578.6	-0.0186513
148022	TICAM1	2253.74	-0.0197037
2073	ERCC5	1604.5	-0.0198753
5730	PTGDS	2186.35	-0.0199227
6283	S100A12	1620.71	-0.0202313
10424	PGRMC2	2389.72	-0.0205689
27065	D4S234E	1105.63	-0.0207807
23433	RHOQ	1752.35	-0.0218615
54780	NSMCE4A	2396.56	-0.0219142
4155	MBP	1736.71	-0.0227435
29889	GNL2	2432.21	-0.0228716
22856	CHSY1	2265.22	-0.0230382
9172	MYOM2	978.186	-0.0231498
54436	SH3TC1	1948.18	-0.0231973
8767	RIPK2	1510.75	-0.0253347
123872	DNAAF1	2080.76	-0.0267596
4240	MFGE8	1738.91	-0.0269767
56675	NRIP3	2300.1	-0.0283124
8553	BHLHE40	1251.62	-0.0286152
1230	CCR1	2078.43	-0.0291287
2907	GRINA	2240.22	-0.030366
10019	SH2B3	1572.86	-0.0308254
81603	TRIM8	1968.56	-0.0309002
54453	RIN2	2120.36	-0.0324009
526	ATP6V1B2	1643.47	-0.0326647
55843	ARHGAP15	2323.39	-0.0338877
25820	ARIH1	2065.17	-0.0339589
5023	P2RX1	2242.7	-0.0347346
978	CDA	1816.05	-0.0350836
6627	SNRPA1	1535.23	-0.0359126
23787	MTCH1	1870.33	-0.0374399
10016	PDCD6	1801.38	-0.0378094
6046	BRD2	2001.52	-0.0378292
4144	MAT2A	2438.65	-0.0383089
253782	CERS6	1938.58	-0.0386122
7133	TNFRSF1B	1914.27	-0.0389122
2769	GNA15	1075.31	-0.0390318
1186	CLCN7	1243.44	-0.0391154
11026	LILRA3	2147.77	-0.0401106
59342	SCPEP1	1710.17	-0.04058
27069	GHITM	2433.25	-0.0406949
8291	DYSF	1286.2	-0.0414915
1462	VCAN	908.982	-0.0419867
55577	NAGK	1740.12	-0.0432636
3280	HES1	2027.63	-0.0433349
7763	ZFAND5	2337.53	-0.0436477
10261	IGSF6	1757.15	-0.0436518
59	ACTA2	2298.31	-0.0440717
51646	YPEL5	2132.68	-0.044391
55013	CCDC109B	2118.36	-0.0445413
51362	CDC40	2340.5	-0.0446095
30968	STOML2	2324	-0.0454389
7297	TYK2	2313.9	-0.0466162
292	SLC25A5	2395.4	-0.0467605
3927	LASP1	2185.86	-0.0471816
5230	PGK1	2287.59	-0.0475561
80148	PQLC1	1956.53	-0.0477409
3105	HLA-A	1310.82	-0.0499036
1471	CST3	890.76	-0.0500507
80233	C17orf70	2123.38	-0.0501132
10577	NPC2	834.968	-0.0504579
11140	CDC37	2156	-0.0507589
6282	S100A11	2310.49	-0.0515245
10627	MYL12A	2177.06	-0.0515384
64747	MFSD1	1136.41	-0.0515404
1959	EGR2	760.269	-0.0519733
57162	PELI1	1821.37	-0.0527114
5597	MAPK6	1881.8	-0.0536702
57178	ZMIZ1	1326.74	-0.0543926
11222	MRPL3	1965.86	-0.0544781
11151	CORO1A	2147.5	-0.0551222
9600	PITPNM1	1614.78	-0.0551828
467	ATF3	2075.07	-0.0555317
56257	MEPCE	2059.32	-0.0572576
2207	FCER1G	937.694	-0.0573818
7071	KLF10	2306.09	-0.0574467
8942	KYNU	2266.71	-0.0583647
2203	FBP1	1752.43	-0.0587268
2799	GNS	1159.89	-0.0588458
6867	TACC1	2222.23	-0.0603537
2268	FGR	1776.48	-0.0609172
3109	HLA-DMB	852.504	-0.060954
55847	CISD1	2439.07	-0.0619086
596	BCL2	2159.95	-0.0621845
23645	PPP1R15A	1279.6	-0.0622264
54976	C20orf27	1992.29	-0.0638544
4049	LTA	2200.28	-0.0642365
7879	RAB7A	2295.31	-0.0652739
10097	ACTR2	2231.06	-0.0653247
9403	2017-09-15	2304.25	-0.06626
84034	EMILIN2	1412.93	-0.0669371
9107	MTMR6	2074.23	-0.0691036
4005	LMO2	1313.78	-0.0692218
5142	PDE4B	2087.4	-0.071085
3281	HSBP1	2113.78	-0.0711014
929	CD14	487.538	-0.0718792
55839	CENPN	2416.35	-0.0729021
6257	RXRB	2278.37	-0.0740878
11033	ADAP1	1064.7	-0.0742514
1649	DDIT3	1323.74	-0.0744035
56851	C15orf24	2347.26	-0.0751178
246126	TXLNG2P	1959.96	-0.0753892
23593	HEBP2	1929.33	-0.0761513
10528	NOP56	2090.31	-0.0762576
11010	GLIPR1	2180.44	-0.0766298
55905	RNF114	2212.62	-0.0771604
23034	SAMD4A	2235.99	-0.0775749
9315	NREP	2133	-0.0776162
10492	SYNCRIP	1740.84	-0.0776614
54504	CPVL	971.034	-0.0783056
10801	2017-09-09	1852.7	-0.0787491
3108	HLA-DMA	1375.26	-0.0795882
896	CCND3	1926.36	-0.0796776
6902	TBCA	2344.45	-0.0797396
6992	PPP1R11	2425.24	-0.0803674
9450	LY86	1302.11	-0.0809018
1843	DUSP1	1652.38	-0.0810694
1845	DUSP3	1338.39	-0.0811678
8635	RNASET2	1785.21	-0.0814329
1512	CTSH	1750.27	-0.0814627
3936	LCP1	1760.78	-0.0823206
29107	NXT1	2216.99	-0.0823318
51071	DERA	2037.66	-0.0826324
29105	C16orf80	1039.69	-0.0826468
92703	TMEM183A	2286.45	-0.0835501
6275	S100A4	1924.75	-0.083663
79585	CORO7	2442.09	-0.0843525
5538	PPT1	961.337	-0.0848504
3156	HMGCR	2415.57	-0.0856613
9204	ZMYM6	2126.78	-0.0865185
5920	RARRES3	2434.23	-0.0865687
373156	GSTK1	2164.62	-0.0865868
23219	FBXO28	2215.1	-0.0868364
10287	RGS19	1716	-0.0876434
3301	DNAJA1	1443.73	-0.0888752
5226	PGD	2391.73	-0.089401
8533	COPS3	2407.47	-0.0898723
9380	GRHPR	2343.53	-0.0900023
10672	GNA13	2177.96	-0.0907793
9688	NUP93	2311.25	-0.0909492
50650	ARHGEF3	1705.22	-0.0920702
55039	TRMT12	2414.47	-0.0925503
6388	SDF2	1944.27	-0.0935027
23099	ZBTB43	1941.09	-0.0945358
7037	TFRC	2148.49	-0.0948758
1347	COX7A2	2439.73	-0.0950543
4929	NR4A2	1321.07	-0.0953976
1984	EIF5A	2146.13	-0.0964554
3074	HEXB	2176.47	-0.0968792
3728	JUP	2013.83	-0.0969423
1609	DGKQ	2323.08	-0.0969999
29108	PYCARD	2210.86	-0.0972608
6722	SRF	2392.8	-0.0975854
1175	AP2S1	1839.3	-0.0993441
7846	TUBA1A	1935.44	-0.0995284
6119	RPA3	2088.38	-0.0995996
23077	MYCBP2	1740.16	-0.0998008
1503	CTPS	2379.12	-0.100243
55032	SLC35A5	2137.56	-0.10146
29851	ICOS	1338.37	-0.101786
55748	CNDP2	1478.82	-0.102119
290	ANPEP	1811.69	-0.102482
1665	DHX15	2128.26	-0.103692
2526	FUT4	1795.38	-0.104347
9332	CD163	1971.69	-0.104381
5336	PLCG2	1365.03	-0.106059
6451	SH3BGRL	2124.38	-0.106391
57132	CHMP1B	1413.63	-0.106726
23385	NCSTN	2111.67	-0.10719
2935	GSPT1	1813.11	-0.10731
84981	MIR22HG	2130.38	-0.107539
7019	TFAM	2156.48	-0.10784
4924	NUCB1	1654.19	-0.108816
10153	CEBPZ	2101.5	-0.109693
5501	PPP1CC	1620.55	-0.110132
4706	NDUFAB1	1729.31	-0.111541
8812	CCNK	1983.82	-0.11181
5725	PTBP1	1927.18	-0.111843
11031	RAB31	1093.47	-0.112628
353514	LILRA5	1655.25	-0.112855
5551	PRF1	1438.11	-0.113305
4697	NDUFA4	1785.96	-0.113472
387	RHOA	2297.05	-0.113536
2956	MSH6	1735.41	-0.113729
2354	FOSB	1318.41	-0.113734
6277	S100A6	2132.27	-0.114234
79961	DENND2D	2379.73	-0.114311
2961	GTF2E2	2346.88	-0.115919
3460	IFNGR2	1047	-0.116337
9123	SLC16A3	1344.29	-0.117994
397	ARHGDIB	1831.96	-0.118174
830	CAPZA2	1821.44	-0.119228
9114	ATP6V0D1	1611.52	-0.1194
10250	SRRM1	1675.91	-0.119975
55007	FAM118A	2007.11	-0.120076
6643	SNX2	2393.51	-0.1222
4729	NDUFV2	1953.13	-0.123324
7529	YWHAB	2308.86	-0.123669
2357	FPR1	760.654	-0.123771
9533	POLR1C	2003.09	-0.124396
6240	RRM1	1704.21	-0.124418
3904	LAIR2	2420.34	-0.125231
5997	RGS2	1144.06	-0.126138
114908	TMEM123	2429.47	-0.126665
57048	PLSCR3	1582.24	-0.126902
57130	ATP13A1	1900.65	-0.126985
9135	RABEP1	1630.34	-0.127637
65117	RSRC2	2364.05	-0.1277
5515	PPP2CA	1688.52	-0.12813
6402	SELL	1744	-0.128194
25976	TIPARP	771.134	-0.129765
3384	ICAM2	2013.8	-0.129837
6136	RPL12	1651.37	-0.130649
25926	NOL11	2222.81	-0.131538
10476	ATP5H	2333.66	-0.131978
2950	GSTP1	2014.9	-0.132223
7175	TPR	1620.21	-0.132713
8649	LAMTOR3	2235.91	-0.136103
4860	PNP	1172.42	-0.136554
5326	PLAGL2	2255.38	-0.13684
64859	OBFC2A	1962.01	-0.137301
1870	E2F2	1114.7	-0.13859
26511	CHIC2	2122.95	-0.140155
8418	CMAHP	2436.03	-0.141477
9943	OXSR1	2239.59	-0.141556
57161	PELI2	2290.36	-0.142078
3956	LGALS1	2127.05	-0.142222
7430	EZR	1670.1	-0.142229
8905	AP1S2	1395.99	-0.142619
440026	TMEM41B	2417.49	-0.142735
5971	RELB	1955.03	-0.143819
79081	C11orf48	1646.2	-0.144034
1973	EIF4A1	2022.01	-0.145331
1340	COX6B1	1939.86	-0.145893
1604	CD55	2087.08	-0.146759
8673	VAMP8	2314.83	-0.148031
8766	RAB11A	2267.34	-0.148449
8804	CREG1	1950.5	-0.148621
7045	TGFBI	1126.96	-0.149179
3627	CXCL10	988.93	-0.149238
4973	OLR1	635.938	-0.149434
2773	GNAI3	2385.31	-0.149842
10096	ACTR3	2138.83	-0.15024
4694	NDUFA1	2007.59	-0.150316
805	CALM2	2057.05	-0.150833
23370	ARHGEF18	1212.69	-0.151796
506	ATP5B	1756.57	-0.151888
25801	GCA	2267.45	-0.152107
81542	TMX1	1732.07	-0.15225
1848	DUSP6	1048.35	-0.152464
1050	CEBPA	1666.7	-0.152481
3727	JUND	2024.35	-0.152943
9920	KBTBD11	2046.9	-0.153078
9921	RNF10	2339.7	-0.153082
2219	FCN1	905.278	-0.153263
10791	VAMP5	1253.42	-0.153488
7454	WAS	2338.01	-0.153797
25963	TMEM87A	1964.26	-0.154092
3059	HCLS1	1799.25	-0.154419
50807	ASAP1	1824.78	-0.15456
60	ACTB	1789.82	-0.1554
51092	SIDT2	1357.32	-0.156666
432	ASGR1	2407.2	-0.156722
54934	KANSL2	1290.94	-0.157634
7431	VIM	1127.41	-0.158417
2512	FTL	1054.93	-0.158878
92856	IMP4	2011.63	-0.159084
9960	USP3	1674.42	-0.159838
51075	TMX2	2081.62	-0.159924
10094	ARPC3	1841.58	-0.160478
7756	ZNF207	2136.66	-0.161466
3725	JUN	1748.1	-0.161624
2633	GBP1	2337.47	-0.162567
4637	MYL6	2280.37	-0.164416
4067	LYN	658.727	-0.164434
4602	MYB	1947.52	-0.164565
1192	CLIC1	1990.15	-0.164979
9839	ZEB2	2140.53	-0.165247
84790	TUBA1C	1639.85	-0.167464
1521	CTSW	1681.12	-0.168292
2210	FCGR1B	1448.89	-0.168518
7867	MAPKAPK3	1444.09	-0.168555
4084	MXD1	1456.52	-0.169137
2212	FCGR2A	2391.01	-0.169231
308	ANXA5	2340.32	-0.171963
56942	CMC2	2228.41	-0.172628
55803	ADAP2	1018.34	-0.172653
30844	EHD4	2189.48	-0.173166
4711	NDUFB5	2143.84	-0.173436
4780	NFE2L2	1669.69	-0.174174
23560	GTPBP4	1784.14	-0.174394
4664	NAB1	2226.61	-0.174537
57559	STAMBPL1	2014.71	-0.174616
51388	NIP7	1908.95	-0.174814
7314	UBB	1770.29	-0.175052
23423	TMED3	2160.51	-0.177714
5329	PLAUR	1536.2	-0.178118
4714	NDUFB8	2051.74	-0.178755
8992	ATP6V0E1	1621.81	-0.17962
55969	C20orf24	2266.45	-0.179621
25847	ANAPC13	2383.61	-0.179752
9262	STK17B	1300.8	-0.179983
6386	SDCBP	1688.54	-0.180107
9086	EIF1AY	1337.4	-0.182632
9749	PHACTR2	1454.42	-0.184374
4191	MDH2	1274.63	-0.184873
5351	PLOD1	2321.41	-0.186104
80745	THUMPD2	2393.82	-0.186201
6612	SUMO3	1606.26	-0.186236
1436	CSF1R	524.424	-0.187194
10953	TOMM34	1888.5	-0.187763
4190	MDH1	1898.26	-0.188838
10519	CIB1	2003.52	-0.188937
1520	CTSS	2280.16	-0.18904
1351	COX8A	2251.68	-0.189207
9477	MED20	2079.26	-0.189614
463	ZFHX3	1461.6	-0.189969
10589	DRAP1	1788.98	-0.19103
55191	NADSYN1	2220.1	-0.191867
5887	RAD23B	2307.26	-0.192581
23424	TDRD7	2241.95	-0.194338
23	ABCF1	2130.14	-0.194355
5265	SERPINA1	2056.68	-0.19637
55003	PAK1IP1	2279.44	-0.196557
1105	CHD1	1958.9	-0.198498
8655	DYNLL1	1695.71	-0.199057
5547	PRCP	1693.8	-0.202987
4946	OAZ1	1250.83	-0.203322
80223	RAB11FIP1	2116.66	-0.20672
51659	GINS2	1946.36	-0.207282
25996	REXO2	2435.34	-0.207435
3101	HK3	1401.99	-0.207942
51371	POMP	1778.41	-0.208608
54997	TESC	1929.77	-0.208951
29924	EPN1	2059.21	-0.209903
4069	LYZ	1210.73	-0.210512
8337	HIST2H2AA3	1535.93	-0.212197
50999	TMED5	2115.87	-0.212876
103	ADAR	2417.77	-0.21311
2023	ENO1	1763.94	-0.214437
7100	TLR5	1701.72	-0.214609
10875	FGL2	444.811	-0.21713
30817	EMR2	1511.94	-0.217285
56978	PRDM8	1384.39	-0.217946
4218	RAB8A	1205.07	-0.218826
23608	MKRN1	1875.2	-0.218899
3005	H1F0	1565.21	-0.219712
1997	ELF1	2125.66	-0.219712
10376	TUBA1B	1405.42	-0.220471
2643	GCH1	1994.63	-0.220648
5660	PSAP	877.9	-0.222011
10212	DDX39A	1863.63	-0.226575
51023	MRPS18C	1312.36	-0.226731
8140	SLC7A5	761.464	-0.22693
5691	PSMB3	1973.17	-0.227129
942	CD86	2380.7	-0.227856
25901	CCDC28A	1900.95	-0.229853
4794	NFKBIE	1762.93	-0.229886
9802	DAZAP2	1646.01	-0.230326
1992	SERPINB1	2160.31	-0.230767
10437	IFI30	1400.09	-0.232216
11145	PLA2G16	2146.1	-0.233806
10063	COX17	1577.35	-0.233836
4615	MYD88	1994.17	-0.2356
5162	PDHB	1937.73	-0.235698
221472	FGD2	727.092	-0.240646
55092	TMEM51	1571.26	-0.243539
2896	GRN	847.895	-0.245582
55596	ZCCHC8	2322.75	-0.24566
10899	JTB	1532.27	-0.246735
2517	FUCA1	2101.09	-0.247093
950	SCARB2	1530.18	-0.250668
4066	LYL1	1726.13	-0.251741
79759	ZNF668	2383.55	-0.253694
10549	PRDX4	1607.86	-0.25408
5687	PSMA6	2220.52	-0.254575
9056	SLC7A7	772.614	-0.254941
66008	TRAK2	2025.54	-0.256294
5699	PSMB10	1433.65	-0.256912
5686	PSMA5	1719.13	-0.258639
79887	PLBD1	956.131	-0.259092
1535	CYBA	1142.11	-0.260509
64581	CLEC7A	1595.1	-0.260907
6303	SAT1	1270.79	-0.262908
3122	HLA-DRA	720.401	-0.263601
6637	SNRPG	1635.25	-0.264522
1486	CTBS	2245.92	-0.267285
5552	SRGN	1375.68	-0.26836
3113	HLA-DPA1	918.136	-0.269336
9377	COX5A	1942.62	-0.269365
4175	MCM6	1588.66	-0.270154
834	CASP1	1710.28	-0.270537
26519	TIMM10	1182.96	-0.273215
81892	SLIRP	1977.62	-0.273758
9985	REC8	2180.31	-0.274566
6890	TAP1	1197.63	-0.275163
11213	IRAK3	1554.54	-0.275415
3490	IGFBP7	1817.26	-0.275796
644	BLVRA	1422.81	-0.278966
9341	VAMP3	1895.6	-0.279323
7295	TXN	2323.29	-0.279448
55505	NOP10	1655.95	-0.281432
4758	NEU1	1601.01	-0.282728
1318	SLC31A2	729.175	-0.283301
5052	PRDX1	1973.76	-0.284125
8743	TNFSF10	1445.7	-0.284566
51531	C9orf156	1803.03	-0.284914
55048	VPS37C	1071.9	-0.29064
4502	MT2A	1127.55	-0.291245
23223	RRP12	392.59	-0.295014
7027	TFDP1	2261.71	-0.295754
10935	PRDX3	1685.52	-0.297252
27257	LSM1	1853.86	-0.297288
3431	SP110	2332.16	-0.299441
3949	LDLR	725.499	-0.2998
9188	DDX21	1294.94	-0.300407
55122	AKIRIN2	1394.04	-0.301249
3162	HMOX1	1654.66	-0.303714
57103	C12orf5	2260.53	-0.303984
7305	TYROBP	691.914	-0.315372
9308	CD83	924.614	-0.315837
4332	MNDA	1140.4	-0.31917
55054	ATG16L1	1748.14	-0.321741
9447	AIM2	2190.28	-0.326948
1054	CEBPG	2317.73	-0.327253
3669	ISG20	1535.64	-0.327413
2012	EMP1	344.746	-0.328211
56650	CLDND1	2198.51	-0.330022
9246	UBE2L6	2127.87	-0.333095
216	ALDH1A1	1653.88	-0.334005
5721	PSME2	1405.2	-0.334027
5698	PSMB9	2127.79	-0.340462
10379	IRF9	1096.38	-0.344035
64127	NOD2	1208.36	-0.344214
64759	TNS3	2310.95	-0.346972
6772	STAT1	867.964	-0.348724
2153	F5	2321.51	-0.349022
55603	FAM46A	1461.41	-0.356399
51131	PHF11	2208.73	-0.357953
7453	WARS	735.547	-0.360474
51510	CHMP5	1488.05	-0.375883
54809	SAMD9	2028.63	-0.380204
51316	PLAC8	1091.88	-0.380453
9111	NMI	1425.98	-0.384916
5996	RGS1	1184.12	-0.397208
10581	IFITM2	524.61	-0.39738
51734	MSRB1	1631.72	-0.400768
79077	DCTPP1	2293.5	-0.40464
8519	IFITM1	929.087	-0.406138
4258	MGST2	1835.85	-0.406363
64135	IFIH1	1131.7	-0.418659
3433	IFIT2	653.152	-0.419712
3965	LGALS9	1377.06	-0.419816
4082	MARCKS	523.261	-0.428015
3043	HBB	1244.23	-0.444054
23643	LY96	995.977	-0.453095
6773	STAT2	899.082	-0.457929
3020	H3F3A	1259.58	-0.459054
8638	OASL	1351.01	-0.461122
51363	CHST15	1603.02	-0.46426
3959	LGALS3BP	1357.62	-0.472048
57418	WDR18	2415.58	-0.480873
64761	PARP12	1435.93	-0.485778
968	CD68	1269.52	-0.486477
81030	ZBP1	2101.37	-0.486714
10346	TRIM22	894.631	-0.493076
2584	GALK1	1752.52	-0.496376
7298	TYMS	1350.8	-0.496976
3902	LAG3	1441.2	-0.540256
4939	OAS2	1407.48	-0.543402
199	AIF1	1303.79	-0.548321
4688	NCF2	2324.8	-0.563995
64218	SEMA4A	1335.73	-0.564891
8676	STX11	517.171	-0.576771
9381	OTOF	1302.95	-0.59465
51056	LAP3	617.186	-0.643576
3430	IFI35	553.256	-0.675089
200315	APOBEC3A	431.562	-0.675775
9997	SCO2	359.461	-0.679563
79132	DHX58	1553.74	-0.691147
10221	TRIB1	497.921	-0.696687
1890	TYMP	723.361	-0.707123
56935	C11orf75	1509.27	-0.715273
3665	IRF7	1061.28	-0.721422
4600	MX2	626.769	-0.730024
8531	CSDA	1162.44	-0.746766
51191	HERC5	461.034	-0.781204
55601	DDX60	1464.85	-0.80473
952	CD38	2248.32	-0.819102
475	ATOX1	1779.53	-0.860677
55008	HERC6	1164.68	-0.897025
7153	TOP2A	1777.68	-0.908948
54739	XAF1	644.354	-0.924513
6036	RNASE2	734.793	-0.926505
3512	IGJ	1970.57	-0.95712
3437	IFIT3	1228.34	-0.962097
5610	EIF2AK2	394.707	-0.976469
10410	IFITM3	119.2	-0.992789
91543	RSAD2	1826.9	-1.00844
4061	LY6E	337.409	-1.01604
4940	OAS3	562.977	-1.03628
6280	S100A9	596.211	-1.05399
4938	OAS1	1535.73	-1.10621
26010	SPATS2L	1613.36	-1.13927
6279	S100A8	389.579	-1.15992
2537	IFI6	195.069	-1.17497
9636	ISG15	267.235	-1.26289
10561	IFI44	105.04	-1.74663
4599	MX1	62.2638	-1.93395
3429	IFI27	76.1247	-2.23614
10964	IFI44L	45.533	-3.01173

## Sheet: Table S2C
Table S2C: All the DEGs in nonprogressors of CD8+ T cells
EntrezID	Name	CombinedRP	AveLogFC
5473	PPBP	2008.27	1.13744
4753	NELL2	483.927	1.06455
256051	ZNF549	2541.61	0.824407
65986	ZBTB10	1349.57	0.806853
1647	GADD45A	1127.46	0.754472
113791	PIK3IP1	675.985	0.733229
6285	S100B	2402.49	0.716049
55175	KLHL11	1825.14	0.700746
57125	PLXDC1	1239.28	0.660313
1236	CCR7	546.136	0.646056
8910	SGCE	2666.23	0.642654
28984	RGCC	861.897	0.632463
79921	TCEAL4	1763.39	0.620879
8140	SLC7A5	711.566	0.600025
3575	IL7R	610.922	0.598402
4092	SMAD7	1304.84	0.594957
3315	HSPB1	1556.01	0.563139
79673	ZNF329	1167.22	0.562473
23764	MAFF	1446.65	0.55789
374	AREG	2211	0.547976
9806	SPOCK2	1034.58	0.545585
10472	ZNF238	2232.57	0.538902
55450	CAMK2N1	1328.64	0.535045
55769	ZNF83	1863.85	0.533285
2254	FGF9	1889.91	0.524606
4000	LMNA	786.01	0.52207
7050	TGIF1	2381.52	0.519566
3012	HIST1H2AE	2657.48	0.51778
23492	CBX7	1537.38	0.515398
8660	IRS2	1060.92	0.51367
11123	RCAN3	1654.98	0.513557
8204	NRIP1	2155.83	0.499869
7057	THBS1	1282.18	0.498053
56271	BEX4	1797.19	0.493714
55893	ZNF395	2094.47	0.485601
5734	PTGER4	944.569	0.477582
87	ACTN1	1981.47	0.472664
27244	SESN1	2295.8	0.47007
1407	CRY1	1615.2	0.466754
687	KLF9	1442.21	0.466535
23178	PASK	922.292	0.455809
23635	SSBP2	2247.84	0.455072
3475	IFRD1	2144.34	0.449609
55793	FAM63A	1676.47	0.449121
26018	LRIG1	1912.89	0.448648
27161	EIF2C2	1646.43	0.438407
8754	ADAM9	2234.7	0.4221
7644	ZNF91	2455.31	0.421856
5142	PDE4B	1916.19	0.420512
161291	TMEM30B	2360.69	0.4198
22936	ELL2	1516.8	0.4191
4929	NR4A2	1554.53	0.416202
57161	PELI2	2170.09	0.414483
4942	OAT	2233.55	0.410986
10140	TOB1	1139.95	0.407064
64174	DPEP2	2898.93	0.403584
83700	JAM3	2366.73	0.403273
8491	MAP4K3	2068.48	0.403011
7280	TUBB2A	1492.46	0.401977
902	CCNH	1895.41	0.396176
29116	MYLIP	1415.99	0.39584
1039	CDR2	1744.47	0.390415
23258	DENND5A	2152.19	0.387708
10208	USPL1	1735.51	0.384037
4780	NFE2L2	2297.36	0.382537
11320	MGAT4A	1497.17	0.378134
8718	TNFRSF25	1588.07	0.376991
51348	KLRF1	1593.77	0.375532
64112	MOAP1	2169.56	0.372803
29107	NXT1	1326.88	0.372741
8284	KDM5D	1308.36	0.369762
138050	HGSNAT	2203.23	0.364658
5209	PFKFB3	1346.78	0.363799
2117	ETV3	2023.44	0.362428
8761	PABPC4	2098.53	0.361026
6653	SORL1	2206.53	0.360776
8013	NR4A3	2347.17	0.36069
2043	EPHA4	1871.21	0.360046
1975	EIF4B	2320.71	0.358513
3096	HIVEP1	2596.98	0.356643
8531	CSDA	1119.76	0.356173
54541	DDIT4	1675.64	0.355269
6192	RPS4Y1	943.344	0.354406
330	BIRC3	1484.72	0.354295
7738	ZNF184	2536.86	0.354019
64081	PBLD	2637.12	0.353679
9249	DHRS3	1702.84	0.353437
23710	GABARAPL1	1247.02	0.352166
7832	BTG2	1412.23	0.349883
51176	LEF1	1285.52	0.349649
51278	IER5	1887.91	0.349001
1027	CDKN1B	1825.48	0.348462
7124	TNF	1572.39	0.343487
940	CD28	1831.52	0.341739
2879	GPX4	2595.93	0.341326
8553	BHLHE40	1237.62	0.338947
57162	PELI1	2021.03	0.333934
57711	ZNF529	2463.1	0.332774
7048	TGFBR2	2574.69	0.331089
79693	YRDC	2349.66	0.330356
399665	FAM102A	1971.29	0.329163
10124	ARL4A	2447.94	0.328982
9825	SPATA2	2150.42	0.326374
6832	SUPV3L1	1751.43	0.325716
7764	ZNF217	2436.11	0.324553
23169	SLC35D1	2362.81	0.323843
58473	PLEKHB1	2468.34	0.32375
55422	ZNF331	2301.99	0.323115
29940	DSE	2504.88	0.322584
56929	FEM1C	2144.92	0.321272
23645	PPP1R15A	1460.7	0.317471
7486	WRN	2056.32	0.314158
196	AHR	2560.97	0.312376
29080	CCDC59	1811.18	0.312074
54934	KANSL2	1836.5	0.311755
3858	KRT10	2208.23	0.311339
2289	FKBP5	2593.01	0.311174
3726	JUNB	2326.6	0.310534
8809	IL18R1	1913.6	0.310346
54941	RNF125	1181.36	0.309329
22822	PHLDA1	1193.09	0.309204
10808	HSPH1	1324.3	0.309087
1901	S1PR1	1934.25	0.307713
51386	EIF3L	2521.6	0.307531
6498	SKIL	2229.29	0.306211
64919	BCL11B	2679.79	0.305563
54529	ASNSD1	1294.88	0.30367
53637	S1PR5	2286.11	0.302772
29105	C16orf80	1741.85	0.302195
2308	FOXO1	2245.66	0.301676
23210	JMJD6	1890.56	0.300214
81631	MAP1LC3B	2099.42	0.300086
7277	TUBA4A	1578.92	0.299421
10794	ZNF460	2728.13	0.299174
10456	HAX1	2521.73	0.298457
51303	FKBP11	1461.88	0.298422
10424	PGRMC2	1887.35	0.296554
1054	CEBPG	2208.01	0.29594
7259	TSPYL1	1893.81	0.295076
5621	PRNP	1946.18	0.294971
8027	STAM	2563.7	0.294176
960	CD44	2674.14	0.294084
23429	RYBP	1411.76	0.293027
8653	DDX3Y	2047.53	0.292502
55270	NUDT15	2549.76	0.291827
2091	FBL	2496.15	0.291734
27250	PDCD4	2340.9	0.289946
7163	TPD52	2252.96	0.289398
4189	DNAJB9	2296.31	0.28928
9929	JOSD1	1768.1	0.288745
120227	CYP2R1	2593.29	0.288524
22850	ADNP2	1795.59	0.288027
9710	KIAA0355	1961.3	0.287589
5055	SERPINB2	1444.23	0.287488
54674	LRRN3	2194.8	0.286585
54876	DCAF16	1847.11	0.285387
27316	RBMX	2238.36	0.284829
6304	SATB1	2355.16	0.284622
3337	DNAJB1	1293.63	0.284279
256987	SERINC5	2288.58	0.282806
10370	CITED2	2479.66	0.281694
5921	RASA1	2531.64	0.281089
10640	EXOC5	2885.62	0.280509
5187	PER1	2231.26	0.27981
79441	HAUS3	1943.97	0.279705
26049	FAM169A	2714.88	0.279271
51526	C20orf111	2058.88	0.279151
55787	TXLNG	2670.44	0.278191
7561	ZNF14	1930.16	0.275289
23135	KDM6B	2421.42	0.273743
80162	ATHL1	1165.27	0.26933
10693	CCT6B	2416.62	0.269083
10289	EIF1B	1649.24	0.267382
60626	RIC8A	2067.57	0.267381
9792	SERTAD2	2394.23	0.265976
23411	SIRT1	2626.79	0.265035
26515	FXC1	2590.48	0.264581
93081	TEX30	2130.88	0.261978
23484	LEPROTL1	2358.76	0.26103
22863	ATG14	2081.87	0.260262
22834	ZNF652	2670.58	0.260069
924	CD7	2127.01	0.259446
1831	TSC22D3	2014.79	0.258486
84124	ZNF394	1914.87	0.258374
64595	TTTY15	1953.86	0.258355
8493	PPM1D	2666.87	0.257424
26586	CKAP2	2505.72	0.257056
3459	IFNGR1	2683.45	0.256891
1105	CHD1	1486.45	0.256845
4833	NME4	2184.15	0.256759
5805	PTS	2109.58	0.255294
54107	POLE3	2439.69	0.254719
51012	SLMO2	2048.72	0.253688
60561	RINT1	2701.68	0.253631
80149	ZC3H12A	2500.55	0.253225
4118	MAL	1412.28	0.252774
27122	DKK3	2189.15	0.251026
25926	NOL11	1658.62	0.250972
2959	GTF2B	1752.17	0.250748
9439	MED23	2427.73	0.250427
3678	ITGA5	2014.59	0.249996
54855	FAM46C	1723.89	0.249681
1968	EIF2S3	2775.14	0.249389
7494	XBP1	2230.25	0.247995
23601	CLEC5A	2725.95	0.247231
79609	METTL21D	2166.32	0.246438
8925	HERC1	2288.52	0.245693
738	C11orf2	2719.86	0.243665
23479	ISCU	2220.94	0.243654
80273	GRPEL1	2219.59	0.242985
9619	ABCG1	2143.02	0.242013
51003	MED31	2418.87	0.241645
1153	CIRBP	2265.55	0.240392
1880	GPR183	1451.39	0.240206
53827	FXYD5	2041.73	0.23947
64376	IKZF5	2637.44	0.239304
3682	ITGAE	2499.58	0.238071
6638	SNRPN	2037.53	0.236717
253959	RALGAPA1	2416.41	0.236496
8507	ENC1	1794.41	0.236274
25977	NECAP1	2155.53	0.235229
6434	TRA2B	2596.62	0.234496
55636	CHD7	2670.03	0.233843
56945	MRPS22	2522.75	0.233773
643641	ZNF862	2718.81	0.23187
4289	MKLN1	2447.13	0.231415
677	ZFP36L1	2564.99	0.231126
1545	CYP1B1	1907.79	0.230458
28974	C19orf53	2127.04	0.229559
29062	WDR91	2712.62	0.228468
26986	PABPC1	2369.52	0.22825
89853	FAM125B	2614.27	0.228199
2876	GPX1	2492.9	0.227791
23211	ZC3H4	2284.34	0.227001
10668	CGRRF1	2156.64	0.22567
25976	TIPARP	2170.93	0.223683
8555	CDC14B	2654.91	0.223558
3119	HLA-DQB1	2345.14	0.222863
27000	DNAJC2	2567.74	0.222049
694	BTG1	1901.07	0.221541
114034	TOE1	2662.3	0.219866
9852	EPM2AIP1	2687.48	0.219389
29896	TRA2A	2124.13	0.219256
5929	RBBP5	2418.65	0.218555
7128	TNFAIP3	1493.26	0.21789
951	CD37	2519.13	0.217109
63935	PCIF1	2716.61	0.215555
57602	USP36	1713.56	0.214518
9967	THRAP3	2842.67	0.214366
115207	KCTD12	2367.83	0.213321
3684	ITGAM	1862.81	0.213263
84060	RBM48	2680.94	0.21175
4616	GADD45B	2353.38	0.211464
114049	WBSCR22	1952.36	0.210788
7844	RNF103	2176.98	0.209999
5007	OSBP	2574.03	0.209246
8665	EIF3F	2556.65	0.207999
4783	NFIL3	2602.01	0.207989
6132	RPL8	2569.13	0.2079
6137	RPL13	2046.64	0.207888
4736	RPL10A	2715.52	0.207264
9975	NR1D2	2528.12	0.206244
440026	TMEM41B	2157.99	0.2062
92856	IMP4	2424.45	0.205595
9775	EIF4A3	2261.35	0.205555
55818	KDM3A	2567.27	0.205253
81853	TMEM14B	2148	0.205183
7508	XPC	2295.35	0.204349
84617	TUBB6	2624.73	0.204303
23774	BRD1	2528.54	0.203084
6193	RPS5	2054.65	0.202264
51696	HECA	2726.46	0.201455
8676	STX11	1928.46	0.201175
3301	DNAJA1	2595.08	0.201097
51646	YPEL5	2416.99	0.20003
79753	SNIP1	2260.72	0.199767
9709	HERPUD1	2084.1	0.196171
7040	TGFB1	2394	0.195821
9867	PJA2	2558.84	0.195627
7852	CXCR4	2082.3	0.19512
5037	PEBP1	2705.81	0.194811
10393	ANAPC10	2412.07	0.194552
6203	RPS9	2660.26	0.1934
57335	ZNF286A	2495.86	0.192833
285282	RABL3	2494.47	0.192551
5199	CFP	2637.52	0.192485
923	CD6	2071.74	0.192042
9668	ZNF432	2441.15	0.191709
55625	ZDHHC7	2648.12	0.191084
6775	STAT4	2389.77	0.190942
10423	CDIPT	2592.09	0.190567
114791	TUBGCP5	2532.57	0.190497
4790	NFKB1	2283.83	0.189638
1937	EEF1G	2199.67	0.188807
26030	PLEKHG3	2638.43	0.188538
10320	IKZF1	1320.66	0.188532
23338	PHF15	2344.15	0.188212
6497	SKI	2343.7	0.187716
64061	TSPYL2	1975.89	0.181241
23531	MMD	2748.12	0.18084
1783	DYNC1LI2	2362	0.180706
246126	TXLNG2P	1386.87	0.180583
64786	TBC1D15	2035.41	0.178978
9367	RAB9A	2498.05	0.178534
84525	HOPX	2370.2	0.177786
51182	HSPA14	2439.41	0.177768
4953	ODC1	2261.08	0.177193
4335	MNT	2709.01	0.177125
969	CD69	1952.37	0.176261
4240	MFGE8	2727.8	0.174744
30817	EMR2	2434.14	0.174443
7251	TSG101	2309.46	0.174274
3608	ILF2	2483.82	0.173467
25983	NGDN	2566.11	0.173407
230	ALDOC	2071.44	0.173113
23588	KLHDC2	2706.71	0.170771
1649	DDIT3	1031.48	0.168901
4209	MEF2D	1654.35	0.167547
80895	ILKAP	2612.55	0.166074
51499	TRIAP1	2660.56	0.165387
6124	RPL4	2727.59	0.165304
64772	ENGASE	2438.14	0.16415
8664	EIF3D	2545.55	0.162794
11102	RPP14	2677.96	0.162649
23067	SETD1B	2660.68	0.162324
7766	ZNF223	2605.89	0.1619
8354	HIST1H3I	2377.68	0.161518
51573	GDE1	2654.43	0.161427
55819	RNF130	2825.42	0.1603
93210	PGAP3	2652.22	0.160005
26053	AUTS2	1505.49	0.159754
27247	NFU1	2333.85	0.158814
50615	IL21R	2436.96	0.157779
375	ARF1	2672.16	0.15735
59342	SCPEP1	2810.36	0.156894
6175	RPLP0	2559.01	0.156481
23351	KHNYN	2615.56	0.1557
51009	DERL2	2121.67	0.155208
8731	RNMT	2508.35	0.15489
1453	CSNK1D	2050.61	0.152402
11221	DUSP10	2116.72	0.151951
57062	DDX24	2425.59	0.151742
1846	DUSP4	2467.34	0.151558
6130	RPL7A	2106.66	0.150873
921	CD5	2414.12	0.150674
6139	RPL17	2336.27	0.15059
79188	TMEM43	2178.82	0.150464
54663	WDR74	2386.42	0.150134
9550	ATP6V1G1	2447.51	0.149922
10950	BTG3	2284.26	0.147245
26137	ZBTB20	2692.25	0.14674
5905	RANGAP1	2018.16	0.146019
8334	HIST1H2AC	2269.39	0.145901
51647	FAM96B	2611.12	0.145399
2355	FOSL2	2555	0.14499
10383	TUBB4B	2681.41	0.144403
9667	SAFB2	2725.95	0.143948
29937	NENF	2016.9	0.143311
10567	RABAC1	2486.31	0.143137
10105	PPIF	2491.24	0.142653
11224	RPL35	2568.42	0.142594
50810	HDGFRP3	2128.25	0.142108
54800	KLHL24	2625.79	0.141449
2010	EMD	2170.67	0.141385
55802	DCP1A	2268.24	0.140436
383	ARG1	2244.55	0.138215
5538	PPT1	2189.35	0.136742
57599	WDR48	2689.11	0.136444
54606	DDX56	2649.42	0.135911
8884	SLC5A6	2450.19	0.135404
9921	RNF10	2701.03	0.134827
2935	GSPT1	2090.86	0.132324
55268	ECHDC2	2638.73	0.132313
79707	NOL9	2314.3	0.13182
678	ZFP36L2	2508.82	0.131679
55280	CWF19L1	2640.48	0.131531
10911	UTS2	2686.81	0.131199
23175	LPIN1	2684.8	0.130532
90864	SPSB3	2092.61	0.130046
3702	ITK	2498.15	0.130002
6430	SRSF5	2562.14	0.129719
79091	METTL22	2480.34	0.12774
8843	HCAR3	2504.58	0.127389
10519	CIB1	2165.08	0.127
6503	SLA	2636.04	0.12549
9807	IP6K1	2407.54	0.125429
51188	SS18L2	2422.69	0.125107
8878	SQSTM1	2475.94	0.12416
10628	TXNIP	1802.01	0.123781
80223	RAB11FIP1	2528.77	0.123714
3803	KIR2DL2	2525.7	0.122767
9643	MORF4L2	2318.4	0.121425
3823	KLRC3	2579.99	0.120942
26051	PPP1R16B	1505.8	0.120359
58486	ZBED5	2867.25	0.119885
2217	FCGRT	2345.61	0.118801
5996	RGS1	1224.54	0.116669
3091	HIF1A	2489.53	0.116659
819	CAMLG	2423.01	0.115297
55775	TDP1	2704.72	0.11466
22930	RAB3GAP1	2556.39	0.114599
114548	NLRP3	1655.21	0.113805
6448	SGSH	1953.93	0.112894
64398	MPP5	2560.86	0.111185
54455	FBXO42	2664.7	0.110342
51307	FAM53C	2685.4	0.108931
1455	CSNK1G2	2603.07	0.108823
2810	SFN	2638.73	0.10737
6513	SLC2A1	2138.39	0.106051
1316	KLF6	1608.65	0.103332
5423	POLB	2599.86	0.100378
864	RUNX3	2708.85	0.100099
126299	ZNF428	2704.82	0.099409
8481	OFD1	2718.88	0.0990611
3804	KIR2DL3	1873.44	0.0966091
54436	SH3TC1	1437.56	0.0956944
602	BCL3	2538.78	0.0952187
79016	DDA1	2242.34	0.0948567
79157	MFSD11	2088.1	0.0916184
912	CD1D	2117.45	0.0898302
29978	UBQLN2	2549.61	0.0884471
3157	HMGCS1	2268.94	0.0883878
84268	RPAIN	2693.32	0.0877732
6992	PPP1R11	2495	0.0869618
138151	NACC2	2831.39	0.0863692
3006	HIST1H1C	2241.13	0.085187
57107	PDSS2	2395.53	0.0846716
7378	UPP1	2561.42	0.0837477
5090	PBX3	2534.99	0.0835883
1408	CRY2	2419.44	0.0827902
8896	BUD31	2159.44	0.0826595
3725	JUN	1523.05	0.0804234
27314	RAB30	2476.46	0.0802137
6129	RPL7	2419.34	0.0801569
9086	EIF1AY	1997.69	0.0775506
23062	GGA2	2528.26	0.077328
56942	CMC2	2703.11	0.0758466
202181	LOC202181	2581.89	0.0756714
5366	PMAIP1	1948.95	0.0751801
3685	ITGAV	2668.46	0.0750939
80224	NUBPL	2407.16	0.0748317
6176	RPLP1	2533.27	0.0747319
32	ACACB	2547.79	0.0741477
1844	DUSP2	2720.95	0.0734236
4048	LTA4H	2591.59	0.0733442
2204	FCAR	2597.96	0.0721449
4050	LTB	1579.69	0.0719606
51185	CRBN	2706.13	0.0706595
55843	ARHGAP15	2491.11	0.0697087
203	AK1	2439.83	0.0678828
3309	HSPA5	2712.07	0.0677374
26276	VPS33B	2502.83	0.0669109
8971	H1FX	2718.35	0.0663578
55173	MRPS10	2062.6	0.0662988
79568	C2orf47	2539.35	0.0661375
11031	RAB31	1575.9	0.0655172
54707	GPN2	2600.85	0.0643283
26505	CNNM3	2553.89	0.0642823
7357	UGCG	2530	0.0640119
27065	D4S234E	1514.15	0.0632318
10153	CEBPZ	2619.83	0.06216
366	AQP9	2383.91	0.0609218
9524	TECR	2517.77	0.0598611
25819	CCRN4L	2392.06	0.0593546
5464	PPA1	2901.4	0.0592664
9781	RNF144A	2849.93	0.0588818
23670	TMEM2	2232.12	0.0575445
1847	DUSP5	2462.49	0.0566544
9891	NUAK1	2524.74	0.0554426
55676	SLC30A6	2434.35	0.0550419
4814	NINJ1	2653.82	0.0544235
26472	PPP1R14B	2586.87	0.0534175
1806	DPYD	2438.61	0.0509861
83443	SF3B5	2387.61	0.0482182
51296	SLC15A3	2204.82	0.0471518
8821	INPP4B	2204.85	0.046867
5934	RBL2	2363.56	0.0466772
6157	RPL27A	2550.27	0.0464182
23505	TMEM131	2704.86	0.0463572
3008	HIST1H1E	2090.31	0.0458547
55544	RBM38	2372.27	0.0450269
6144	RPL21	2474.56	0.043384
154	ADRB2	2484.7	0.0433442
4792	NFKBIA	2132.66	0.042875
8407	TAGLN2	2567.58	0.0404825
23099	ZBTB43	2413.7	0.0397809
10946	SF3A3	2186.64	0.0380627
396	ARHGDIA	2727.8	0.0373655
56984	PSMG2	2711.3	0.0358466
8930	MBD4	1912.47	0.0325074
4065	LY75	2756.44	0.0313957
51690	LSM7	2394.95	0.0297344
597	BCL2A1	2336.33	0.0286666
54820	NDE1	2275.85	0.0264748
2012	EMP1	2517.21	0.0262735
51112	TRAPPC12	2726.85	0.0248795
55803	ADAP2	2452.2	0.024842
55608	ANKRD10	2737.44	0.0235374
10125	RASGRP1	2618.85	0.0234664
9450	LY86	2050.87	0.0223295
3676	ITGA4	2627.35	0.0221438
1514	CTSL1	2144.12	0.021489
2495	FTH1	2870.05	0.0206325
9882	TBC1D4	2467.99	0.0197513
56165	TDRD1	2212.64	0.0192031
10577	NPC2	1546.31	0.0191186
3824	KLRD1	2462.44	0.0189457
51315	KRCC1	2667.41	0.0186978
10981	RAB32	2771.51	0.0179163
1521	CTSW	1495.65	0.0170578
29058	C20orf30	2116.63	0.0162229
6234	RPS28	2423.88	0.0161134
9750	FAM65B	2642.03	0.0158625
9208	LRRFIP1	2199.32	0.0127204
2180	ACSL1	2138.46	0.0120771
4501	MT1X	2254.83	0.00975111
140609	NEK7	2743.33	0.00626182
292	SLC25A5	2690.33	0.00521954
5730	PTGDS	2681.07	0.00307484
51070	NOSIP	2462.52	0.00298639
6776	STAT5A	2711.84	0.002688
1850	DUSP8	2198.99	0.00250538
11161	C14orf1	2741.69	0.00139856
22918	CD93	2534.26	0.000525169
4860	PNP	2897.1	-0.00244506
57223	SMEK2	2899.8	-0.00315513
3099	HK2	2847.35	-0.00412038
116496	FAM129A	2241.94	-0.0053902
526	ATP6V1B2	2680.96	-0.00564952
59338	PLEKHA1	2032.11	-0.0074523
1512	CTSH	1902.8	-0.00850882
6648	SOD2	2345.88	-0.00994331
2319	FLOT2	2698.8	-0.0102828
26001	RNF167	2358.47	-0.0108282
2683	B4GALT1	2342.78	-0.0122859
4681	NBL1	2526.67	-0.0126767
2591	GALNT3	2058.94	-0.0150105
682	BSG	2294.97	-0.0175589
64789	DEM1	2191.05	-0.0190959
79931	TNIP3	2086.56	-0.020333
2512	FTL	2083.24	-0.0217113
10951	CBX1	2842.41	-0.0228657
2203	FBP1	2850.17	-0.0238922
4218	RAB8A	2314.18	-0.0240902
7559	ZNF12	2792.56	-0.0251304
3802	KIR2DL1	2456	-0.0252326
123	PLIN2	2633.07	-0.0254828
1019	CDK4	2817.11	-0.0260629
54780	NSMCE4A	2792.9	-0.0265483
167227	DCP2	2825.55	-0.0292897
9941	EXOG	2876.47	-0.030083
81790	RNF170	2755.09	-0.0306194
7086	TKT	2352.73	-0.0318354
9141	PDCD5	2487.39	-0.0338023
54930	HAUS4	2517.71	-0.0343071
51279	C1RL	2474.94	-0.035224
55048	VPS37C	2874.25	-0.0356236
10219	KLRG1	1697.04	-0.0361727
9314	KLF4	1296.18	-0.0364169
945	CD33	2611.6	-0.0365162
23029	RBM34	2474.35	-0.0369609
51316	PLAC8	1968.57	-0.0373443
3460	IFNGR2	1818.96	-0.0404566
199	AIF1	1279.65	-0.0423687
53829	P2RY13	2591.13	-0.0428969
80227	PAAF1	2707.06	-0.0430241
54210	TREM1	2053.27	-0.0431098
23130	ATG2A	2358.43	-0.0446185
3654	IRAK1	2865.11	-0.0450368
55196	C12orf35	2435.37	-0.0451536
1794	DOCK2	2672.28	-0.0453294
6902	TBCA	2856.79	-0.0455923
10026	PIGK	2517.64	-0.0479297
9749	PHACTR2	2838.19	-0.0492595
972	CD74	1985.35	-0.04977
23370	ARHGEF18	2660.96	-0.0502841
55213	RCBTB1	2833.14	-0.0504175
55140	ELP3	2679.78	-0.0512958
2950	GSTP1	2690.89	-0.0513882
404672	GTF2H5	2592.47	-0.0516938
1786	DNMT1	2370.22	-0.0517286
22900	CARD8	2650.83	-0.0525129
34	ACADM	2071.43	-0.0528158
2149	F2R	2820.14	-0.0532591
4200	ME2	2774.46	-0.0533568
27069	GHITM	2766.41	-0.0542633
5066	PAM	2620.25	-0.0554693
5501	PPP1CC	2767.45	-0.0557656
5997	RGS2	2069.13	-0.0562035
6688	SPI1	2389.05	-0.0563902
8337	HIST2H2AA3	2332.18	-0.0587824
51192	CKLF	2714.22	-0.0590583
4738	NEDD8	2740.03	-0.059483
5430	POLR2A	2029.84	-0.0602338
3066	HDAC2	2505.94	-0.0608424
373156	GSTK1	2837.01	-0.0627726
4711	NDUFB5	2546.67	-0.0629198
60370	AVPI1	2876.82	-0.0650563
1657	DMXL1	2504.46	-0.0652306
171586	ABHD3	2335.1	-0.0667674
55577	NAGK	2489.87	-0.0679214
6375	XCL1	2859.14	-0.0682441
9404	LPXN	1887.64	-0.068273
221692	PHACTR1	2177.26	-0.0684954
23231	SEL1L3	2475.89	-0.0685026
54842	MFSD6	2887.26	-0.0693907
948	CD36	1761.75	-0.0699741
2108	ETFA	2502.45	-0.0702119
253782	CERS6	2720.15	-0.0712197
9873	FCHSD2	2472.93	-0.0720442
26578	OSTF1	2035.47	-0.0728617
9321	TRIP11	2514.51	-0.073121
3560	IL2RB	2133.04	-0.0736146
1603	DAD1	2305.6	-0.0736152
217	ALDH2	2088.97	-0.0743056
2352	FOLR3	2738.47	-0.074719
1102	RCBTB2	2787.64	-0.0748375
1207	CLNS1A	2038.03	-0.0767206
6752	SSTR2	2021.27	-0.0784708
29957	SLC25A24	2695.64	-0.0785538
4644	MYO5A	2584.67	-0.0795429
84159	ARID5B	2881.91	-0.0797349
3108	HLA-DMA	2128.28	-0.0808128
57819	LSM2	2815.1	-0.0831545
1973	EIF4A1	2599.56	-0.0842888
8291	DYSF	2688.15	-0.0855387
55133	SRBD1	2756.7	-0.0856289
7768	ZNF225	2779.51	-0.0858925
8615	USO1	2799.2	-0.0867246
5579	PRKCB	2684.02	-0.0871707
9050	PSTPIP2	2467.16	-0.0875129
3384	ICAM2	2845.23	-0.0877923
29922	NME7	2674.36	-0.0878249
3557	IL1RN	2418.67	-0.0882193
9214	FAIM3	2511.29	-0.0883599
5431	POLR2B	2859.87	-0.0885047
9652	TTC37	2482.63	-0.0906907
5226	PGD	2257.18	-0.090796
4068	SH2D1A	2876.57	-0.0907988
1839	HBEGF	2194.54	-0.0916741
6277	S100A6	2820.69	-0.0919814
1960	EGR3	2459.72	-0.0920382
8906	AP1G2	2881.78	-0.0926448
22796	COG2	2712.57	-0.0932331
28962	OSTM1	2484.87	-0.0934872
3065	HDAC1	2174.23	-0.0935312
4144	MAT2A	2325.01	-0.0937154
3936	LCP1	2049.87	-0.0938298
642	BLMH	2841.82	-0.0938724
22806	IKZF3	2436.4	-0.0946214
51020	HDDC2	2249.26	-0.0949857
7813	EVI5	2426.22	-0.0956249
514	ATP5E	2821.9	-0.0957048
55839	CENPN	2539.67	-0.096158
55359	STYK1	2270.33	-0.0962988
5902	RANBP1	2562.13	-0.0965799
3841	KPNA5	2808.39	-0.0979742
26610	ELP4	2894.04	-0.0979934
80208	SPG11	2088.02	-0.0998099
11118	BTN3A2	1692.21	-0.100125
10788	IQGAP2	2425.01	-0.102813
10904	BLCAP	2692.64	-0.10308
250	ALPP	2714.26	-0.103184
7770	ZNF227	2171.01	-0.103202
55667	DENND4C	2791.53	-0.103879
26040	SETBP1	2763.38	-0.104285
4214	MAP3K1	1936.32	-0.105486
6596	HLTF	2730.11	-0.1063
11026	LILRA3	2139.84	-0.106465
64418	TMEM168	2409.83	-0.108856
3689	ITGB2	1693.97	-0.109168
2896	GRN	1542.53	-0.109257
79590	MRPL24	2895.57	-0.109486
11314	CD300A	2388.03	-0.109861
3181	HNRNPA2B1	2448.4	-0.111089
54964	C1orf56	2537.85	-0.11202
23171	GPD1L	2431.84	-0.112063
50650	ARHGEF3	2668.27	-0.112321
56259	CTNNBL1	2404.24	-0.112563
8635	RNASET2	2088.36	-0.11264
515	ATP5F1	2813.88	-0.113596
706	TSPO	2898.27	-0.113892
5436	POLR2G	2882.24	-0.113965
10384	BTN3A3	2440.97	-0.114278
391	RHOG	2684.22	-0.114742
3005	H1F0	2731.9	-0.115527
1441	CSF3R	2164.76	-0.115616
4702	NDUFA8	2294.67	-0.116211
27095	TRAPPC3	2709.78	-0.116917
55297	CCDC91	2544.41	-0.117435
55622	TTC27	2666.99	-0.117436
950	SCARB2	2862.6	-0.117732
549	AUH	2603.88	-0.118128
6813	STXBP2	2887.27	-0.11855
1675	CFD	1452.41	-0.119305
23421	ITGB3BP	2356.38	-0.119442
5775	PTPN4	2341.2	-0.120359
3597	IL13RA1	2901.1	-0.121225
51326	ARL17A	2560.61	-0.121321
2597	GAPDH	2650.88	-0.122064
28977	MRPL42	2847.7	-0.122102
1520	CTSS	1853.16	-0.122175
2069	EREG	2662.97	-0.122323
1318	SLC31A2	1918.9	-0.122798
3059	HCLS1	2747.19	-0.123394
5725	PTBP1	2701.68	-0.125501
6118	RPA2	2467.18	-0.125849
11315	PARK7	2744.92	-0.125851
6778	STAT6	2839.53	-0.126079
204	AK2	2593.01	-0.126123
55863	TMEM126B	2607.51	-0.126207
79022	TMEM106C	2352.9	-0.126313
1891	ECH1	2729.78	-0.127226
3394	IRF8	1711.28	-0.127246
8631	SKAP1	2836.25	-0.127519
4946	OAZ1	2529.86	-0.128387
51023	MRPS18C	1925.39	-0.1284
10313	RTN3	2671.32	-0.129234
6231	RPS26	2046.77	-0.130666
97	ACYP1	2397.35	-0.13079
8318	CDC45	2797.33	-0.131499
29102	DROSHA	2794.67	-0.131569
55858	TMEM165	2894.57	-0.131745
57418	WDR18	2435.83	-0.131897
51291	GMIP	2466.67	-0.132448
11073	TOPBP1	2444.38	-0.132796
9976	CLEC2B	2548.92	-0.132966
1476	CSTB	1942.61	-0.133102
3396	ICT1	2845.82	-0.133148
9368	SLC9A3R1	2368.87	-0.133358
51816	CECR1	2146.75	-0.133447
79573	TTC13	2790.36	-0.133587
9879	DDX46	2778.4	-0.134422
5175	PECAM1	2576.65	-0.134983
1730	DIAPH2	2841.29	-0.135209
114044	MCM3AP-AS1	2592.78	-0.136855
54504	CPVL	1078.39	-0.138305
89845	ABCC10	2895.97	-0.138775
9466	IL27RA	2623.08	-0.139664
10666	CD226	2658.33	-0.139927
7533	YWHAH	2069.44	-0.140337
10055	SAE1	2127.14	-0.14054
91369	ANKRD40	2710.29	-0.141847
84790	TUBA1C	2328.16	-0.14326
6303	SAT1	2491.39	-0.144058
55759	WDR12	2749.32	-0.144321
6671	SP4	2625.01	-0.144876
8682	PEA15	2489.98	-0.144953
5790	PTPRCAP	2586.8	-0.145043
23761	PISD	2719.25	-0.145304
5899	RALB	2515.01	-0.145421
963	CD53	2714.92	-0.145531
2771	GNAI2	2668.41	-0.145899
80145	THOC7	2896.38	-0.14605
637	BID	2521.24	-0.146559
1200	TPP1	2407.63	-0.147303
23550	PSD4	2437.04	-0.147365
55340	GIMAP5	2423.62	-0.147599
6256	RXRA	2735.57	-0.148114
7867	MAPKAPK3	2165.88	-0.14837
223	ALDH9A1	2614.01	-0.148515
6120	RPE	2524.88	-0.148556
54799	MBTD1	2392.58	-0.149224
79064	TMEM223	2839.81	-0.14933
56954	NIT2	2685.1	-0.150203
10287	RGS19	2438.45	-0.150716
7554	ZNF8	2370.38	-0.150839
6347	CCL2	2256.16	-0.151115
808	CALM3	2414.15	-0.151118
2634	GBP2	2495.1	-0.151458
10261	IGSF6	2186.77	-0.151572
54518	APBB1IP	1765.43	-0.152592
9840	KIAA0748	2592.24	-0.153539
79023	NUP37	2610.57	-0.154565
847	CAT	2576.43	-0.156321
5532	PPP3CB	2638.48	-0.156836
29095	ORMDL2	2622.19	-0.157719
10768	AHCYL1	1946.3	-0.157777
10533	ATG7	2006.82	-0.158401
79675	FASTKD1	2644.54	-0.158858
10231	RCAN2	2417.65	-0.159265
51478	HSD17B7	2448.43	-0.159481
896	CCND3	2132.84	-0.159735
5702	PSMC3	2763.16	-0.15981
71	ACTG1	2568.29	-0.160695
10213	PSMD14	2843.46	-0.160725
51474	LIMA1	2525.09	-0.161049
23039	XPO7	2813.48	-0.161082
8905	AP1S2	1475.11	-0.161333
5890	RAD51B	2856.59	-0.161936
29887	SNX10	2138.86	-0.163795
327	APEH	2689.41	-0.164505
25865	PRKD2	2630.56	-0.165052
65123	INTS3	2770.57	-0.165114
26034	IPCEF1	2536.95	-0.165267
1992	SERPINB1	2473.65	-0.165418
55191	NADSYN1	2819.29	-0.166294
2960	GTF2E1	2903.07	-0.166349
2224	FDPS	2716.59	-0.167005
4924	NUCB1	2703.14	-0.168043
11010	GLIPR1	2632.75	-0.168238
25998	IBTK	2592.1	-0.168345
29969	MDFIC	2439.72	-0.168557
81603	TRIM8	2745.91	-0.168562
28957	MRPS28	2399.85	-0.16929
7293	TNFRSF4	2579.48	-0.169672
7454	WAS	2737.87	-0.169718
5144	PDE4D	2309.43	-0.169996
7940	LST1	1526.9	-0.17072
64747	MFSD1	1257.64	-0.171055
3281	HSBP1	2871.84	-0.171142
8766	RAB11A	2721.13	-0.171606
10240	MRPS31	2537.12	-0.172478
5378	PMS1	2325.85	-0.173136
5214	PFKP	2841.96	-0.173328
3949	LDLR	1966.27	-0.173502
22889	KIAA0907	2781.72	-0.173506
353514	LILRA5	2277.83	-0.174134
5634	PRPS2	2471.94	-0.174336
29923	HILPDA	2149.85	-0.175033
9055	PRC1	2563.03	-0.175237
23344	ESYT1	2170.69	-0.175438
5329	PLAUR	1822.66	-0.176099
10574	CCT7	2720.03	-0.177064
6654	SOS1	2323.38	-0.177628
93594	WDR67	2391.39	-0.177742
8914	TIMELESS	2128.74	-0.178619
1164	CKS2	2271.3	-0.178927
5216	PFN1	2013.54	-0.178975
4720	NDUFS2	2822.1	-0.179191
54951	COMMD8	2601.36	-0.179844
6675	UAP1	2454.83	-0.179939
80198	MUS81	2117.51	-0.180154
3588	IL10RB	2307.45	-0.180502
10428	CFDP1	1965.96	-0.180599
8302	KLRC4	1952.31	-0.180651
5106	PCK2	2536.78	-0.180812
7389	UROD	2721.36	-0.180858
11212	PROSC	2593.69	-0.181947
23307	FKBP15	2878.13	-0.181955
8548	BLZF1	2595.43	-0.182243
914	CD2	2301.52	-0.182315
7879	RAB7A	2419.66	-0.183161
23317	DNAJC13	2854.27	-0.183863
79053	ALG8	2761.46	-0.185666
1445	CSK	2192.09	-0.186589
10488	CREB3	2868.75	-0.186601
11027	LILRA2	2498.5	-0.186613
8850	KAT2B	1987.41	-0.187437
23335	WDR7	2682.46	-0.187788
3418	IDH2	2333.19	-0.188398
23355	VPS8	2490.65	-0.189214
9377	COX5A	2588.25	-0.189253
10072	DPP3	2541.21	-0.189413
5696	PSMB8	2753.37	-0.189669
7402	UTRN	2615.49	-0.190254
64170	CARD9	2848.31	-0.190476
3383	ICAM1	2203.12	-0.190883
54677	CROT	2447.85	-0.191487
51642	MRPL48	2013.05	-0.191885
2023	ENO1	2136.31	-0.192142
3101	HK3	2132.15	-0.192154
522	ATP5J	2624.04	-0.192329
5547	PRCP	2072.32	-0.193033
51510	CHMP5	2542.15	-0.193157
64231	MS4A6A	1008.37	-0.193368
1781	DYNC1I2	2172.86	-0.193954
6342	SCP2	2831.94	-0.19398
2212	FCGR2A	1589.66	-0.194126
55603	FAM46A	2427.95	-0.194686
355	FAS	2701.49	-0.194703
29082	CHMP4A	2806.91	-0.194756
9235	IL32	1767.55	-0.195782
9604	RNF14	2859.64	-0.195849
55131	RBM28	2665.8	-0.196024
10094	ARPC3	2536.61	-0.196221
79037	PVRIG	2704.4	-0.196402
55163	PNPO	2205.46	-0.197192
55252	ASXL2	1956.13	-0.197285
8317	CDC7	2199.61	-0.197882
3920	LAMP2	2745.75	-0.197986
2799	GNS	1963.66	-0.198031
6773	STAT2	1399.69	-0.198338
2215	FCGR3B	2587.27	-0.199667
9446	GSTO1	2156.05	-0.199746
307	ANXA4	2519.39	-0.199787
192669	EIF2C3	2769.43	-0.200228
2040	STOM	2658.42	-0.200413
23208	SYT11	2680.17	-0.201216
10606	PAICS	2309.12	-0.201292
8530	CST7	2354.96	-0.201316
4898	NRD1	2576.36	-0.201827
25941	TPGS2	2620.85	-0.202212
79624	C6orf211	2175.23	-0.202225
9452	ITM2A	2343.5	-0.202387
9551	ATP5J2	2566.13	-0.20321
6850	SYK	2407.13	-0.20387
55074	OXR1	1889.76	-0.204023
50856	CLEC4A	2218.22	-0.204403
3810	KIR2DS5	2471.88	-0.204706
1959	EGR2	1927.85	-0.204878
9194	SLC16A7	2538.32	-0.205022
5567	PRKACB	2721.34	-0.205393
55745	MUDENG	2502.62	-0.205853
3295	HSD17B4	1573.78	-0.2062
10376	TUBA1B	1593.71	-0.206965
115353	LRRC42	2715.49	-0.207184
79622	SNRNP25	1845.25	-0.207227
80342	TRAF3IP3	2623.43	-0.207901
6905	TBCE	2257	-0.208181
1396	CRIP1	2866.67	-0.208238
4478	MSN	2542.46	-0.208813
10616	RBCK1	2741.6	-0.209081
10161	LPAR6	2568.46	-0.209175
55505	NOP10	2585.42	-0.210243
643314	KIAA0754	2344.36	-0.210723
1072	CFL1	2838.24	-0.211209
975	CD81	2473.79	-0.21137
55255	WDR41	2631.49	-0.211579
3074	HEXB	2332.57	-0.211908
3660	IRF2	2782.85	-0.212176
51466	EVL	2105.91	-0.212803
25796	PGLS	2824.96	-0.213031
4245	MGAT1	2717.34	-0.213514
11064	CNTRL	2364.17	-0.213635
10553	HTATIP2	2664.72	-0.213636
7351	UCP2	1958.51	-0.214239
10550	ARL6IP5	2499.9	-0.214244
5162	PDHB	2820.06	-0.21447
1465	CSRP1	2736.8	-0.214793
6611	SMS	2542.55	-0.215211
5147	PDE6D	2174.49	-0.21532
1075	CTSC	1938.68	-0.215335
9939	RBM8A	2626.28	-0.215865
10866	HCP5	2425.06	-0.215971
6046	BRD2	2769.14	-0.216053
6119	RPA3	2827.41	-0.216441
1175	AP2S1	2535.19	-0.217359
27348	TOR1B	2757.6	-0.217575
466	ATF1	2343.04	-0.217691
55752	2017-09-11	2877.1	-0.217854
8826	IQGAP1	2428.56	-0.21851
9918	NCAPD2	2675.41	-0.2187
5660	PSAP	1639.91	-0.21878
2357	FPR1	1074.88	-0.219092
6402	SELL	1212.7	-0.220056
85236	HIST1H2BK	1786.54	-0.22024
1121	CHM	2719.46	-0.221641
8624	PSMG1	2869.73	-0.222215
29851	ICOS	2678.9	-0.222828
47	ACLY	2637.35	-0.223607
5704	PSMC4	2865.21	-0.22383
7767	ZNF224	2430.67	-0.22402
57037	ANKMY2	2717.12	-0.227667
60489	APOBEC3G	1969.37	-0.228129
4121	MAN1A1	2329.56	-0.228265
5110	PCMT1	2014.23	-0.228778
240	ALOX5	2771.05	-0.228779
29110	TBK1	2732.43	-0.228794
9817	KEAP1	2809.65	-0.229277
5111	PCNA	2455.19	-0.22943
66008	TRAK2	2435.81	-0.229723
51	ACOX1	2744.97	-0.229879
54981	C9orf95	2780.05	-0.231435
7203	CCT3	2316.77	-0.231887
11151	CORO1A	1625.75	-0.232108
25939	SAMHD1	2381	-0.232485
10130	PDIA6	2206.96	-0.234032
4664	NAB1	1925.06	-0.234062
8540	AGPS	2651.93	-0.234291
8607	RUVBL1	2812.28	-0.234419
63901	FAM111A	2338.3	-0.234722
9617	MTRF1	1999.21	-0.234821
829	CAPZA1	2892.71	-0.23527
4172	MCM3	2110.08	-0.235548
6916	TBXAS1	1876.21	-0.235922
6302	TSPAN31	2075.18	-0.23684
10269	ZMPSTE24	2745.79	-0.236904
11184	MAP4K1	2333.08	-0.238391
26519	TIMM10	2319.91	-0.238426
11033	ADAP1	2580	-0.239219
79621	RNASEH2B	2903.4	-0.239458
939	CD27	1668.75	-0.239573
57698	KIAA1598	2067.98	-0.239636
4074	M6PR	1702.84	-0.241097
55784	MCTP2	2616.7	-0.241435
80007	C10orf88	2285.6	-0.241498
8833	GMPS	2852.92	-0.241859
9123	SLC16A3	2201.96	-0.242132
8992	ATP6V0E1	2272.46	-0.242144
7266	DNAJC7	2499.39	-0.242847
1355	COX15	2898.33	-0.243203
4173	MCM4	2796.53	-0.243452
317	APAF1	2830.3	-0.243745
8934	RAB7L1	2762.88	-0.24393
54938	SARS2	2755.05	-0.24448
3109	HLA-DMB	1118.26	-0.244976
5499	PPP1CA	2287.79	-0.245779
10935	PRDX3	2390.33	-0.246555
55726	ASUN	2693.13	-0.248179
55876	GSDMB	2489.48	-0.248205
55032	SLC35A5	2558.03	-0.248639
4709	NDUFB3	2634.3	-0.249291
5720	PSME1	2746.41	-0.249323
51744	CD244	1793.48	-0.251437
142	PARP1	1680.61	-0.251992
3251	HPRT1	1698.35	-0.252308
222663	SCUBE3	2382.78	-0.252375
3113	HLA-DPA1	1699.51	-0.252825
200315	APOBEC3A	1001.63	-0.253099
6888	TALDO1	1848.54	-0.253236
54927	CHCHD3	2719.1	-0.253373
55748	CNDP2	1470.06	-0.253433
8673	VAMP8	2106.6	-0.253757
79888	LPCAT1	2456.25	-0.255798
5920	RARRES3	2266.81	-0.257648
81542	TMX1	1775.92	-0.257931
4005	LMO2	1175.63	-0.258213
2745	GLRX	1873.61	-0.258299
10487	CAP1	1927.56	-0.258353
64172	OSGEPL1	2895.93	-0.258483
7133	TNFRSF1B	2470.93	-0.258624
3128	HLA-DRB6	1359.75	-0.258676
5691	PSMB3	2156.8	-0.25895
5265	SERPINA1	1416.32	-0.259523
5521	PPP2R2B	2876.69	-0.260431
3683	ITGAL	2161.28	-0.260486
25801	GCA	1205.45	-0.260831
9014	TAF1B	2718.41	-0.261099
54969	C4orf27	2534.14	-0.261299
10549	PRDX4	2124	-0.261453
29103	DNAJC15	2642.62	-0.261539
1622	DBI	2434.71	-0.261996
203068	TUBB	2060.05	-0.262198
5303	PIN4	2904.83	-0.262321
54438	GFOD1	2140.51	-0.263165
4637	MYL6	2603.51	-0.263942
475	ATOX1	2892	-0.264398
9637	FEZ2	2664.65	-0.264461
3122	HLA-DRA	1105.84	-0.264958
24138	IFIT5	2699.5	-0.266387
9760	TOX	2196.57	-0.266411
9759	HDAC4	2271.45	-0.266449
7049	TGFBR3	1602.33	-0.266722
23108	RAP1GAP2	2417.49	-0.267242
28971	C11orf67	2480.03	-0.267328
8270	LAGE3	2696.42	-0.267681
79155	TNIP2	2858.13	-0.267808
51382	ATP6V1D	2616.58	-0.269082
4522	MTHFD1	2465.24	-0.269172
7127	TNFAIP2	2100.83	-0.270977
5690	PSMB2	2171.24	-0.271189
474344	GIMAP6	1767.73	-0.271671
3927	LASP1	2111.48	-0.272613
4494	MT1F	2546.21	-0.273055
7465	WEE1	2573.65	-0.273306
578	BAK1	2483.97	-0.273365
115201	ATG4A	2518.2	-0.275221
5910	RAP1GDS1	2789.54	-0.27524
59	ACTA2	1714.98	-0.275968
6472	SHMT2	2157.41	-0.276466
309	ANXA6	2294.77	-0.276763
51092	SIDT2	1200.47	-0.27683
2647	BLOC1S1	2017.45	-0.27743
4067	LYN	1110.46	-0.277439
4094	MAF	1787.09	-0.277671
10928	RALBP1	2405.05	-0.278027
55100	WDR70	2547.5	-0.27857
55161	TMEM33	2780.33	-0.279703
10382	TUBB4A	2432.32	-0.279937
2014	EMP3	2106.72	-0.279959
23583	SMUG1	2675.3	-0.280194
6614	SIGLEC1	2509.14	-0.280232
7167	TPI1	2138.5	-0.281671
6275	S100A4	1943.46	-0.281685
11130	ZWINT	2788.17	-0.281692
6282	S100A11	2006.07	-0.283213
55500	ETNK1	2651.86	-0.284148
9784	SNX17	2901.41	-0.28553
6737	TRIM21	2902.99	-0.285622
55281	TMEM140	2211.64	-0.285852
8417	STX7	2301.55	-0.286484
11000	SLC27A3	1984.54	-0.287188
11329	STK38	2828.89	-0.288104
9761	MLEC	2775.06	-0.289092
29088	MRPL15	2127.98	-0.290258
22875	ENPP4	2039.93	-0.290487
11262	SP140	2864.89	-0.291034
1535	CYBA	1759.05	-0.292895
157697	ERICH1	2880.89	-0.293005
4521	NUDT1	2747.59	-0.293593
7295	TXN	2204.63	-0.295177
51668	HSPB11	2436.03	-0.296429
10092	ARPC5	973.075	-0.296829
28969	BZW2	1982.55	-0.297126
2643	GCH1	2554.91	-0.297336
5052	PRDX1	1923.32	-0.298438
23586	DDX58	2597.06	-0.29844
1033	CDKN3	2888.68	-0.299152
6897	TARS	2484.07	-0.299301
51479	ANKFY1	2525.68	-0.300288
60	ACTB	1671.21	-0.302444
80017	C14orf159	2764.33	-0.302691
8672	EIF4G3	2348.43	-0.302764
10096	ACTR3	1841.42	-0.304241
64218	SEMA4A	2089.52	-0.304615
3579	CXCR2	2673.33	-0.304842
10748	KLRAP1	1403.33	-0.305142
9949	AMMECR1	2827.59	-0.306638
23643	LY96	1432.9	-0.306857
3543	IGLL1	1839.67	-0.309031
1192	CLIC1	1761.91	-0.309359
55615	PRR5	2533.87	-0.309744
4688	NCF2	1853.83	-0.315724
5687	PSMA6	2397.37	-0.315957
2242	FES	2364.83	-0.316563
51103	NDUFAF1	2864.85	-0.317801
1808	DPYSL2	1494.96	-0.318117
30009	TBX21	2091.25	-0.318288
55737	VPS35	2372.94	-0.318308
51501	C11orf73	1983.71	-0.318736
4615	MYD88	2100.87	-0.319092
4502	MT2A	1723.59	-0.319273
1666	DECR1	1649.93	-0.319363
953	ENTPD1	2320.35	-0.326236
10437	IFI30	1184.58	-0.326404
7444	VRK2	2384	-0.326521
85363	TRIM5	2536.27	-0.327306
5880	RAC2	1515.15	-0.328851
51283	BFAR	1943.53	-0.330579
6352	CCL5	1860.81	-0.330586
3055	HCK	2155.14	-0.330731
9232	PTTG1	2268.33	-0.333693
493	ATP2B4	1883.65	-0.335241
840	CASP7	2552.05	-0.335823
79415	C17orf62	2115.91	-0.336477
4066	LYL1	2037.97	-0.336872
84034	EMILIN2	1686.64	-0.338596
8655	DYNLL1	1576.17	-0.339546
7305	TYROBP	975.391	-0.34036
3431	SP110	2256.35	-0.340394
432	ASGR1	2672.83	-0.341832
1536	CYBB	1343.2	-0.341879
788	SLC25A20	2204.79	-0.342282
79670	ZCCHC6	2467.76	-0.343468
5795	PTPRJ	1932.63	-0.343674
8459	TPST2	1991.45	-0.344927
9022	CLIC3	2746.17	-0.345276
5685	PSMA4	2332.09	-0.345321
1043	CD52	1766.99	-0.34641
834	CASP1	1716.48	-0.348719
64135	IFIH1	2462.19	-0.351004
7027	TFDP1	1665.45	-0.351139
3695	ITGB7	1990.51	-0.352737
6351	CCL4	2030.32	-0.352843
3958	LGALS3	2524.79	-0.352909
7374	UNG	2479.05	-0.353103
55501	CHST12	2702.96	-0.353349
55072	RNF31	2833.77	-0.354332
51053	GMNN	1958.37	-0.355067
5777	PTPN6	2297.66	-0.355229
5954	RCN1	2849.03	-0.355399
4542	MYO1F	2651.28	-0.359515
1130	LYST	2228.29	-0.359585
6039	RNASE6	2289.36	-0.35964
10627	MYL12A	2143.53	-0.361963
3310	HSPA6	1190.96	-0.362763
79899	PRR5L	1575.5	-0.363031
51071	DERA	1324.82	-0.365388
3669	ISG20	1544.79	-0.365904
27347	STK39	1372.64	-0.366036
10288	LILRB2	1903.59	-0.367229
3604	TNFRSF9	2155.4	-0.369554
54440	SASH3	2368.93	-0.372069
4258	MGST2	2341.28	-0.373806
10538	BATF	2227.63	-0.377325
3071	NCKAP1L	2214.3	-0.381173
6509	SLC1A4	2646.7	-0.381464
11238	CA5B	2128.07	-0.383507
4174	MCM5	1877.36	-0.385909
10346	TRIM22	1820.95	-0.388291
5341	PLEK	1246.4	-0.389434
991	CDC20	2842	-0.389687
54453	RIN2	2802.57	-0.394466
79677	SMC6	1860.98	-0.395441
1870	E2F2	1758.52	-0.395637
9985	REC8	1872.64	-0.398414
302	ANXA2	1701.83	-0.39897
4361	MRE11A	2430.5	-0.40021
55847	CISD1	2068.41	-0.402442
1462	VCAN	742.961	-0.402982
149628	PYHIN1	1645.94	-0.40356
10906	TRAFD1	2538.01	-0.404201
64167	ERAP2	1948.98	-0.404241
79887	PLBD1	1116.04	-0.40913
10797	MTHFD2	2177.45	-0.410082
55096	EBLN2	2640.33	-0.41078
58472	SQRDL	1703.48	-0.411444
4001	LMNB1	2661.43	-0.412456
64581	CLEC7A	1580.33	-0.412713
55423	SIRPG	1686.99	-0.412908
29127	RACGAP1	2195.54	-0.415646
644	BLVRA	1491.69	-0.415865
56925	LXN	2435.52	-0.424062
1123	CHN1	2327.32	-0.42896
25780	RASGRP3	2832.18	-0.433344
5858	PZP	1766.39	-0.435451
7453	WARS	1142.14	-0.437319
283131	NEAT1	2595.7	-0.4375
5422	POLA1	1744.06	-0.440086
5686	PSMA5	1290.57	-0.440342
4818	NKG7	1452.05	-0.44203
3428	IFI16	1820.9	-0.4439
2672	GFI1	2029.65	-0.446679
308	ANXA5	1470.21	-0.452036
25862	USP49	2597.98	-0.45279
5698	PSMB9	1311.5	-0.452792
55320	MIS18BP1	2370.7	-0.453539
9111	NMI	1709.12	-0.454274
79961	DENND2D	898.156	-0.455968
2237	FEN1	2235.94	-0.4596
29909	GPR171	2014.93	-0.4616
2633	GBP1	1292.47	-0.467224
29108	PYCARD	1284.96	-0.467517
929	CD14	779.21	-0.469148
4082	MARCKS	771.653	-0.46956
57823	SLAMF7	1290.17	-0.473686
3957	LGALS2	1311.92	-0.474369
1475	CSTA	2087.12	-0.475608
303	ANXA2P1	2835.15	-0.476616
51734	MSRB1	2407.03	-0.479329
9246	UBE2L6	1522.85	-0.488191
2268	FGR	1111.51	-0.488709
10403	NDC80	1743.07	-0.488759
81030	ZBP1	2561.95	-0.494605
6036	RNASE2	1165.45	-0.494988
54809	SAMD9	2057.8	-0.498841
79682	MLF1IP	2373.5	-0.499582
9768	KIAA0101	2813.74	-0.500278
6890	TAP1	1897.87	-0.505887
9056	SLC7A7	1064.05	-0.506668
64151	NCAPG	2257.5	-0.506966
2999	GZMH	1085.17	-0.513894
8638	OASL	2052.68	-0.51435
445347	TARP	1056.43	-0.517347
3717	JAK2	1773.21	-0.518655
55120	FANCL	1969.96	-0.520819
5699	PSMB10	1159.52	-0.525523
55303	GIMAP4	825.459	-0.529942
11098	PRSS23	1679.37	-0.532971
10875	FGL2	533.354	-0.534525
9289	GPR56	1423.23	-0.535377
10379	IRF9	959.628	-0.53692
3965	LGALS9	2568.67	-0.542014
8519	IFITM1	1115.86	-0.543103
51056	LAP3	948.242	-0.553659
3001	GZMA	820.464	-0.563465
56935	C11orf75	2014.41	-0.564115
6772	STAT1	907.26	-0.565695
7153	TOP2A	1876.97	-0.567389
1234	CCR5	2467.1	-0.567994
8743	TNFSF10	1269.63	-0.56832
51203	NUSAP1	1984.6	-0.589035
5551	PRF1	1451.61	-0.591673
10581	IFITM2	686.375	-0.596563
5336	PLCG2	1434.21	-0.603845
64859	OBFC2A	2274.97	-0.606269
1117	CHI3L2	1612.85	-0.611761
3904	LAIR2	878.99	-0.625062
2219	FCN1	576.401	-0.625206
51363	CHST15	1598.59	-0.626435
684	BST2	1288.27	-0.631381
1436	CSF1R	916.416	-0.633055
9447	AIM2	1754.88	-0.633055
5721	PSME2	866.293	-0.633368
3902	LAG3	1207.64	-0.636937
4069	LYZ	873.222	-0.637202
2	A2M	2093.63	-0.649707
3665	IRF7	1661.24	-0.668662
5610	EIF2AK2	1007.79	-0.674973
64761	PARP12	1117.94	-0.683692
7298	TYMS	1317.38	-0.689835
1230	CCR1	1527.74	-0.696805
6241	RRM2	2255.51	-0.706851
9997	SCO2	899.898	-0.7196
6280	S100A9	484.89	-0.746927
3512	IGJ	958.715	-0.761428
26010	SPATS2L	2152.9	-0.765014
4600	MX2	1001.31	-0.775221
1524	CX3CR1	831.739	-0.775232
3070	HELLS	2620.83	-0.784845
4332	MNDA	840.997	-0.802394
5359	PLSCR1	1731.38	-0.825853
29901	SAC3D1	1039.05	-0.838224
1890	TYMP	764.992	-0.846999
4061	LY6E	791.039	-0.848665
51191	HERC5	1181.22	-0.849979
55008	HERC6	1111.63	-0.8502
55601	DDX60	828.962	-0.852724
4939	OAS2	865.012	-0.863587
9381	OTOF	2151.63	-0.876232
580	BARD1	2750.9	-0.882179
952	CD38	1394.04	-0.895257
3430	IFI35	714.336	-0.903893
4940	OAS3	929.886	-0.927889
10410	IFITM3	314.581	-0.948652
3437	IFIT3	1610.67	-0.971089
11274	USP18	1789.58	-1.03002
9636	ISG15	647.367	-1.06406
51659	GINS2	1654.36	-1.08765
54739	XAF1	482.05	-1.0989
2537	IFI6	391.555	-1.13192
4938	OAS1	986.893	-1.21061
91543	RSAD2	1033.4	-1.21463
3434	IFIT1	940.917	-1.48525
4599	MX1	251.804	-1.62164
10561	IFI44	125.966	-1.88883
3429	IFI27	343.02	-2.0867
10964	IFI44L	39.7234	-3.1332
